# Supplementary material for: Synthesis of diarylmethyl thioethersviaa DABCO-catalyzed 1,6-conjugate addition reaction ofp-quinone methides with organosulfur reagents
Source: Royal Society of Chemistry journal article supplement (doi:10.1039/d3ra01815f), 2023-01-01

**Synthesis of diarylmethyl thioethers via DABCO catalyzed 1,6-conjugate addition  
reaction of *p*-Quinone Methides with Organosulfur Reagents**

Ming-Shan Shuai,<sup>‡a</sup> Xiang Guan,<sup>‡a</sup> Xing-Hai Fei,<sup>a</sup> Mao Zhang,<sup>a</sup> Xiao-Zhong Fu,<sup>a</sup> Bin He,<sup>a</sup> and  
Yong-Long Zhao<sup>\*a</sup>

**Supporting information contents**

|                                                                             |           |
|-----------------------------------------------------------------------------|-----------|
| <b>The minimum inhibitory concentration of diarylmethyl thioethers.....</b> | <b>S2</b> |
| <b>NMR Spectra.....</b>                                                     | <b>S3</b> |

## The minimum inhibitory concentration of diarylmethyl thioethers

Table S1. MIC ( $\mu\text{g/mL}$ ) of the synthesized diarylmethyl thioethers.

| Compounds                      | Gram-positive bacteria  |      | Gram-negative bacteria  |                        | Fungi                    |                          |
|--------------------------------|-------------------------|------|-------------------------|------------------------|--------------------------|--------------------------|
|                                | <i>S. a.</i> ATCC 25923 | MRSA | <i>E. c.</i> ATCC 25922 | <i>P. a.</i> ATCC 9027 | <i>C. a.</i> BNCC 259769 | <i>C. a.</i> BNCC 333935 |
| <b>3a</b>                      | 16                      | 64   | >200                    | >200                   | >200                     | >200                     |
| <b>3b</b>                      | 128                     | 64   | >200                    | >200                   | >200                     | >200                     |
| <b>3c</b>                      | 128                     | >200 | >200                    | >200                   | >200                     | >200                     |
| <b>3d</b>                      | >200                    | >200 | >200                    | >200                   | >200                     | >200                     |
| <b>3e</b>                      | >200                    | >200 | >200                    | >200                   | >200                     | >200                     |
| <b>3f</b>                      | >200                    | >200 | >200                    | >200                   | >200                     | >200                     |
| <b>3g</b>                      | 32                      | 64   | >200                    | >200                   | >200                     | >200                     |
| <b>3h</b>                      | 128                     | >200 | >200                    | >200                   | >200                     | >200                     |
| <b>3i</b>                      | 32                      | 128  | >200                    | >200                   | >200                     | >200                     |
| <b>3j</b>                      | 64                      | >200 | >200                    | >200                   | >200                     | >200                     |
| <b>3k</b>                      | >200                    | >200 | >200                    | >200                   | >200                     | >200                     |
| <b>3l</b>                      | >200                    | >200 | >200                    | >200                   | >200                     | >200                     |
| <b>3m</b>                      | 32                      | 64   | >200                    | >200                   | >200                     | >200                     |
| <b>3n</b>                      | 32                      | 64   | >200                    | >200                   | >200                     | >200                     |
| <b>3o</b>                      | >200                    | >200 | >200                    | >200                   | >200                     | >200                     |
| <b>3p</b>                      | 128                     | 64   | >200                    | >200                   | >200                     | >200                     |
| <b>3q</b>                      | 128                     | 128  | >200                    | >200                   | >200                     | >200                     |
| <b>3r</b>                      | 128                     | >200 | >200                    | >200                   | >200                     | >200                     |
| <b>3s</b>                      | 32                      | 128  | >200                    | >200                   | >200                     | >200                     |
| <b>3t</b>                      | 128                     | >200 | >200                    | >200                   | >200                     | >200                     |
| <b>5a</b>                      | 32                      | 128  | >200                    | >200                   | >200                     | >200                     |
| <b>5b</b>                      | >200                    | >200 | >200                    | >200                   | >200                     | >200                     |
| <b>6</b>                       | 8                       | >200 | >200                    | >200                   | >200                     | >200                     |
| <b>Methicillin sodium salt</b> | --                      | 16   | --                      | --                     | --                       | --                       |
| <b>Levofloxacin</b>            | <0.5                    | <4   | <0.5                    | 64                     | --                       | --                       |
| <b>Fluconazole</b>             | --                      | --   | --                      | --                     | 1                        | 1                        |

<sup>a</sup> *S. a.* ATCC 25923, *Staphylococcus aureus* ATCC 25923; MRSA, Methicillin-resistant *Staphylococcus aureus*; *E. c.*, *Escherichia coli* ATCC 25922; *P. a.*, *Pseudomonas aeruginosa* ATCC 9027; *C. a.* BNCC 259769, *Candida albicans* BNCC 259769; *C. a.* BNCC 333935, *Candida albicans* BNCC 333935.

$^1\text{H}$  and  $^{13}\text{C}$  NMR spectra of compound **3a**

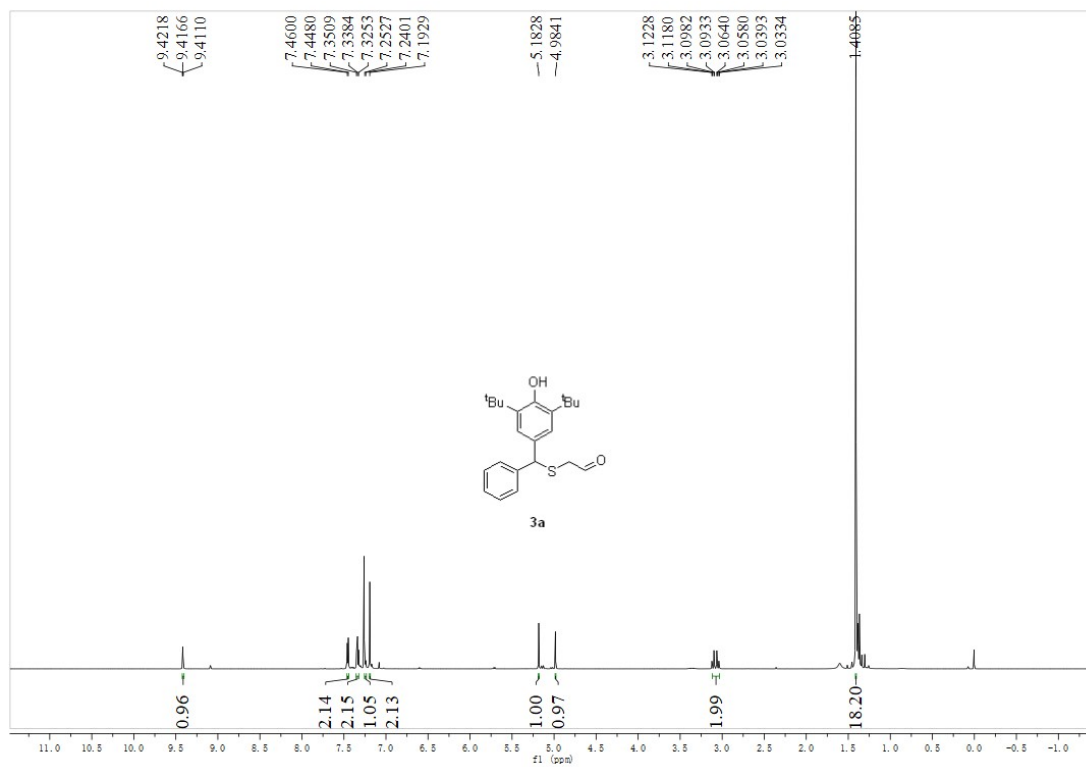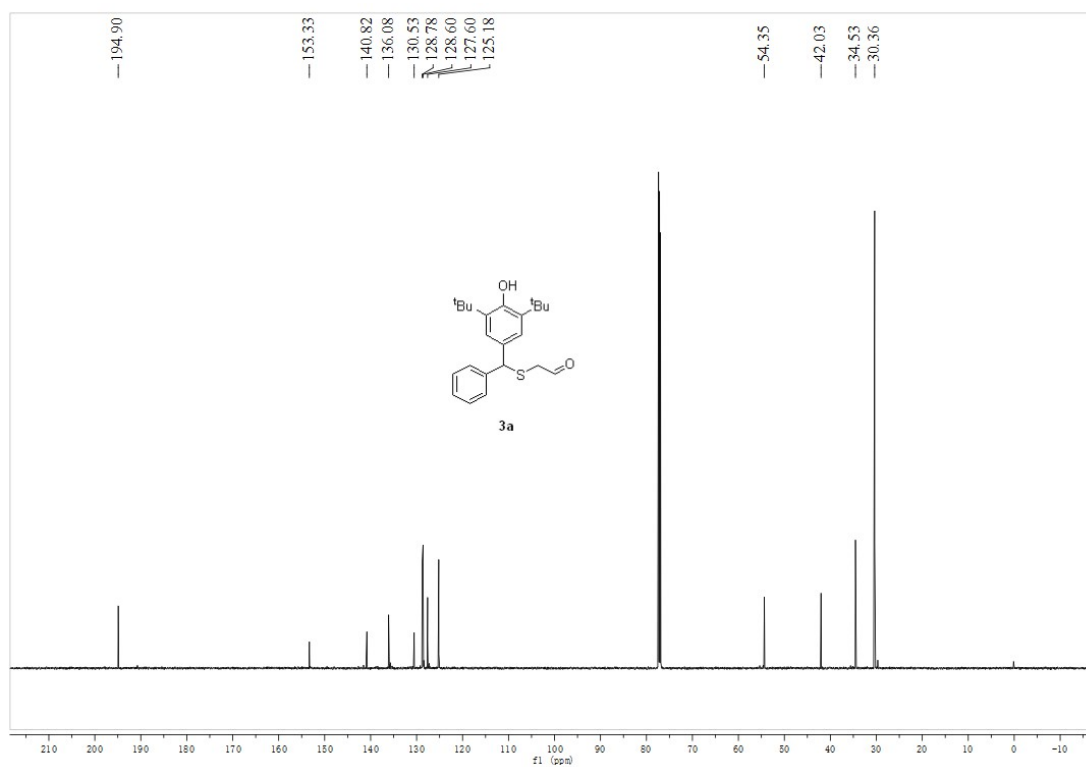

$^1\text{H}$ ,  $^{13}\text{C}$  NMR and  $^{19}\text{F}$  NMR spectra of compound **3b**

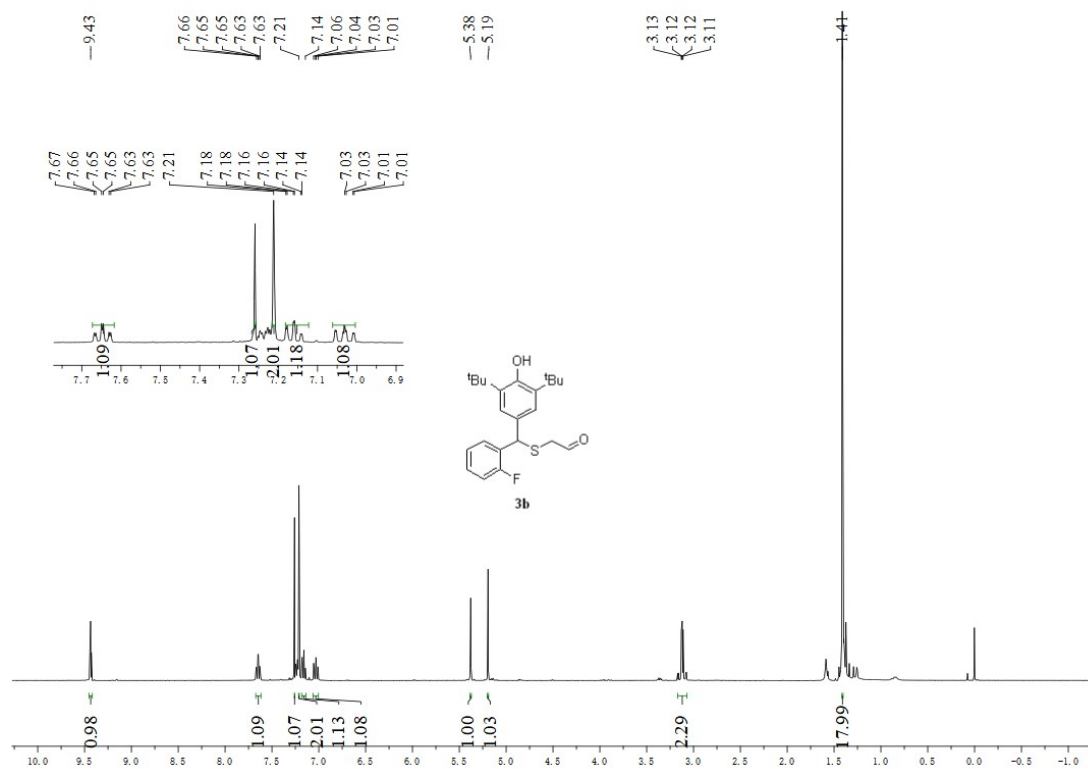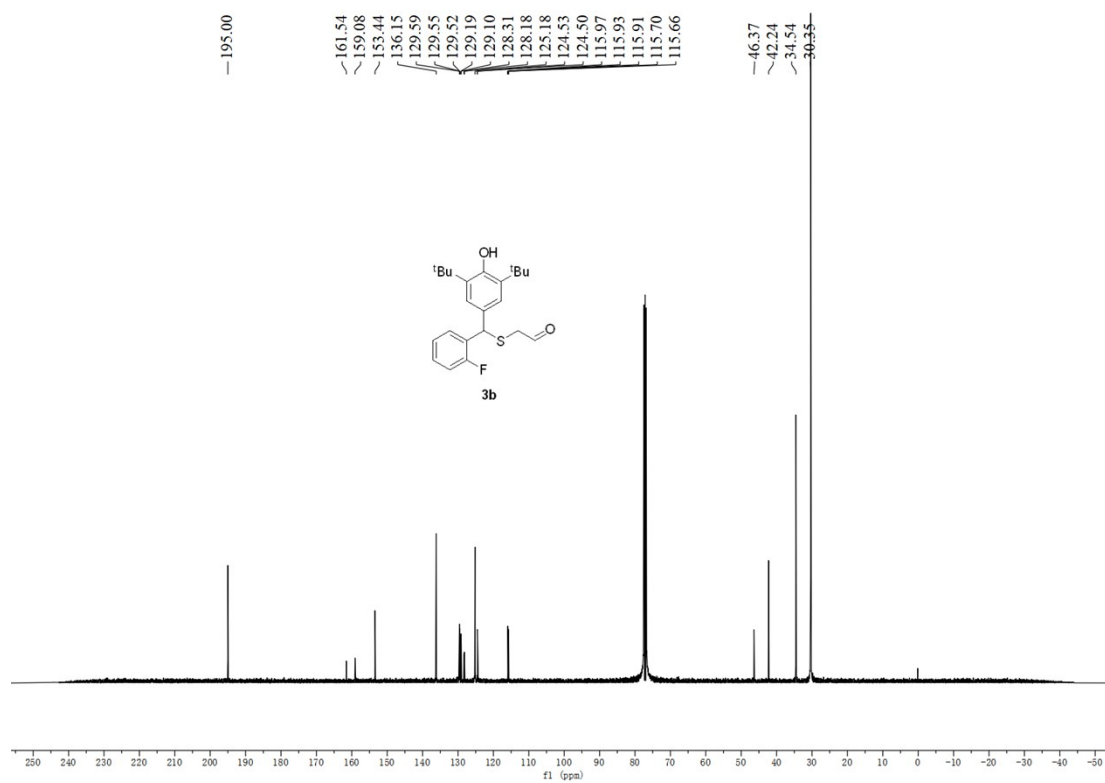

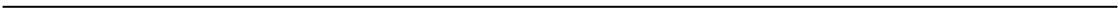

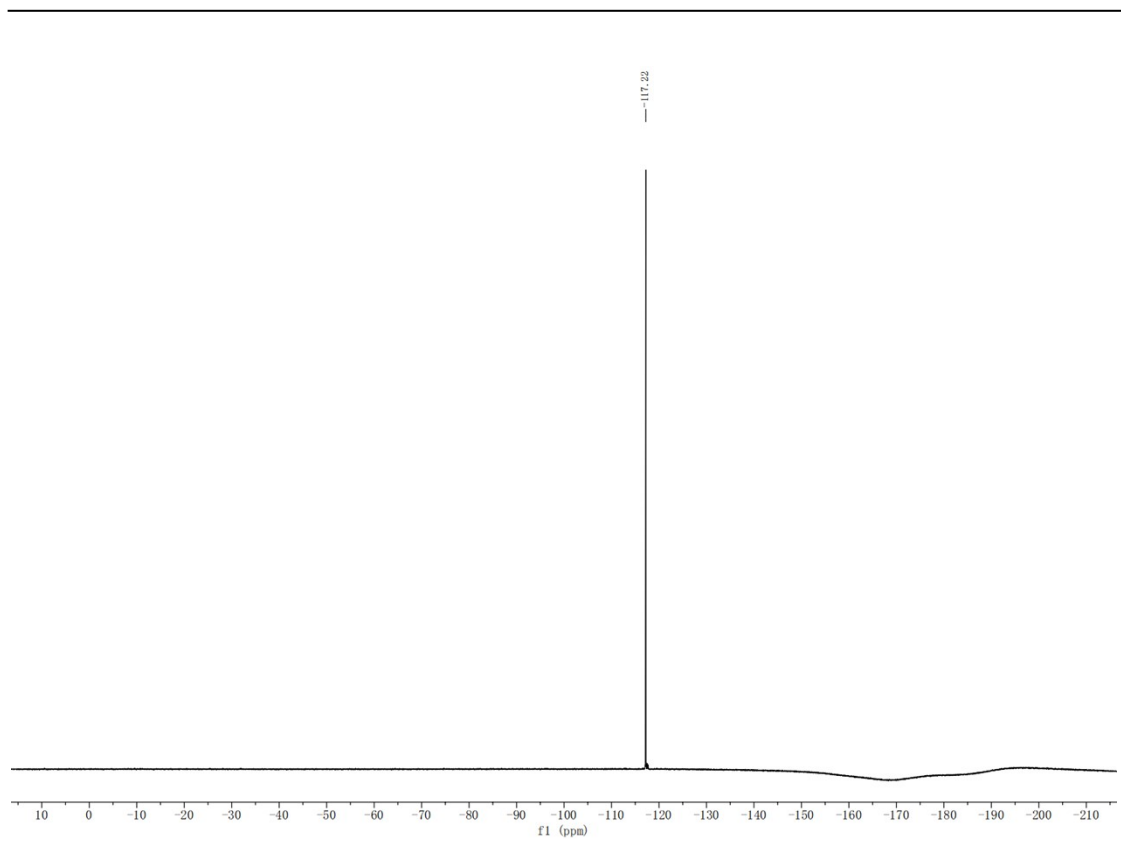

$^1\text{H}$  and  $^{13}\text{C}$  NMR spectra of compound **3c**

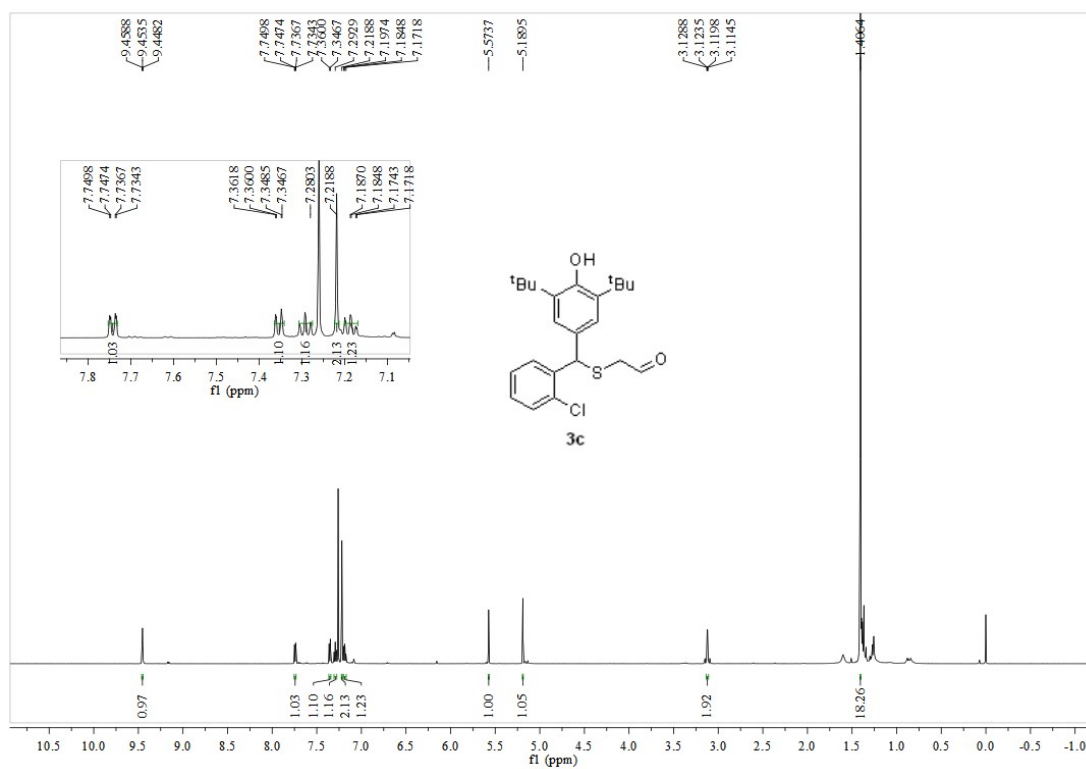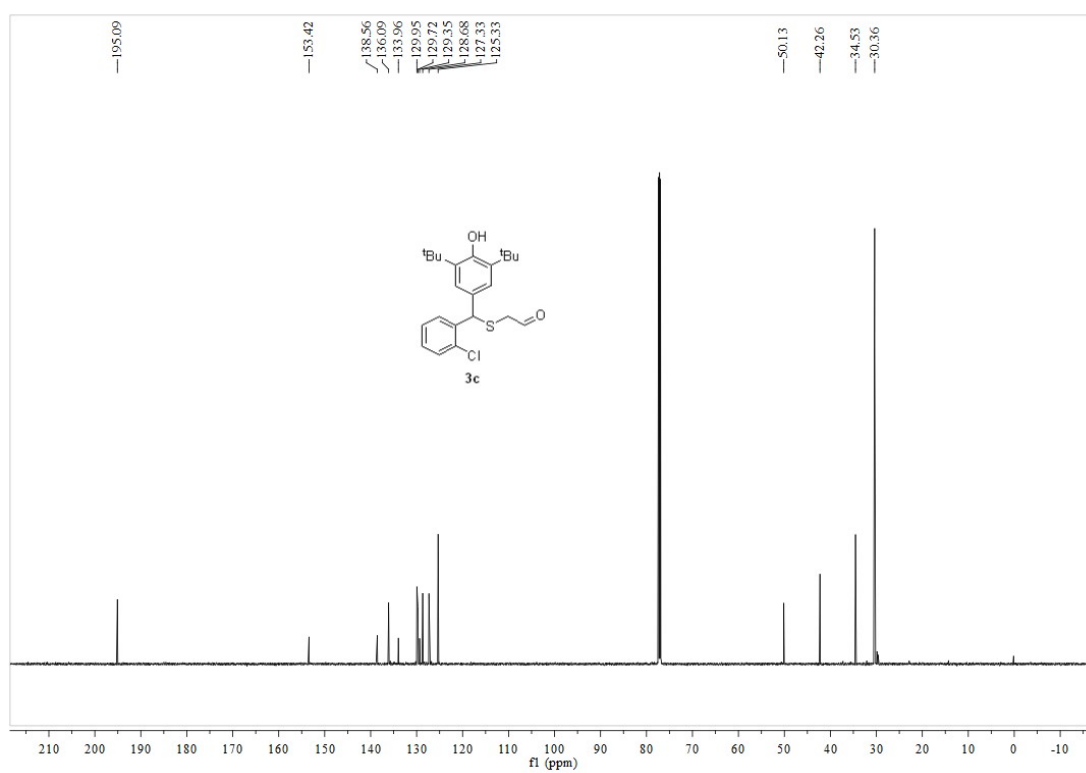

# $^1\text{H}$ and $^{13}\text{C}$ NMR spectra of compound **3d**

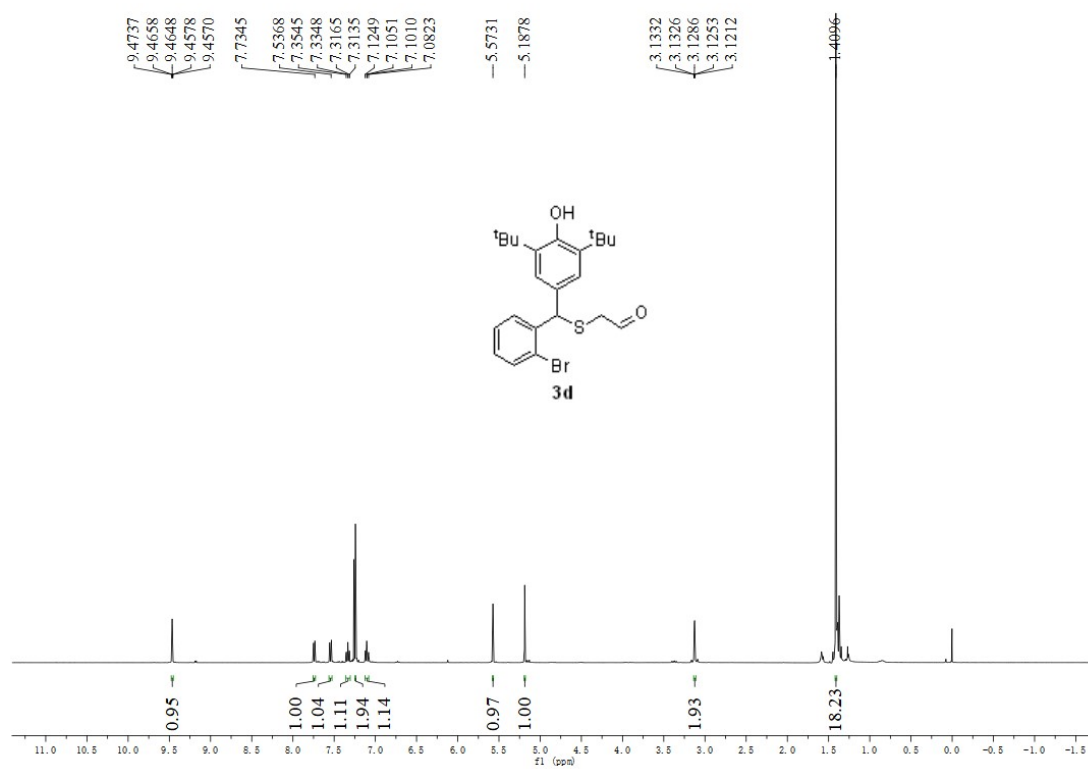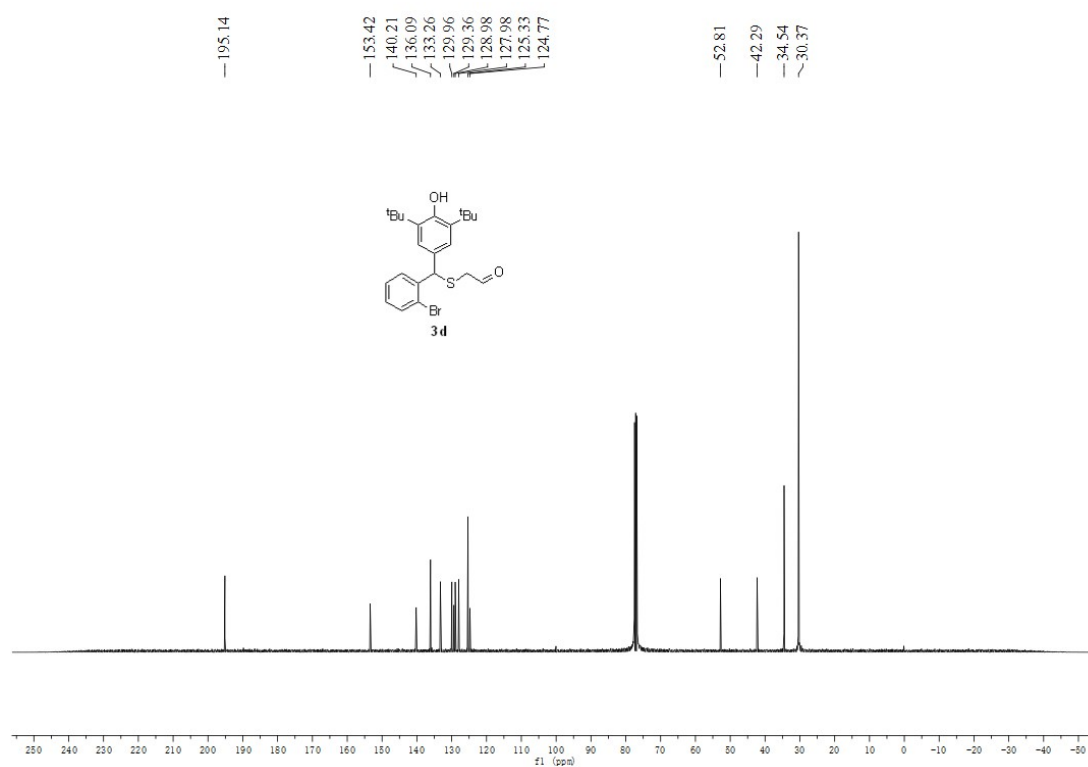



# $^1\text{H}$ and $^{13}\text{C}$ NMR spectra of compound **3e**

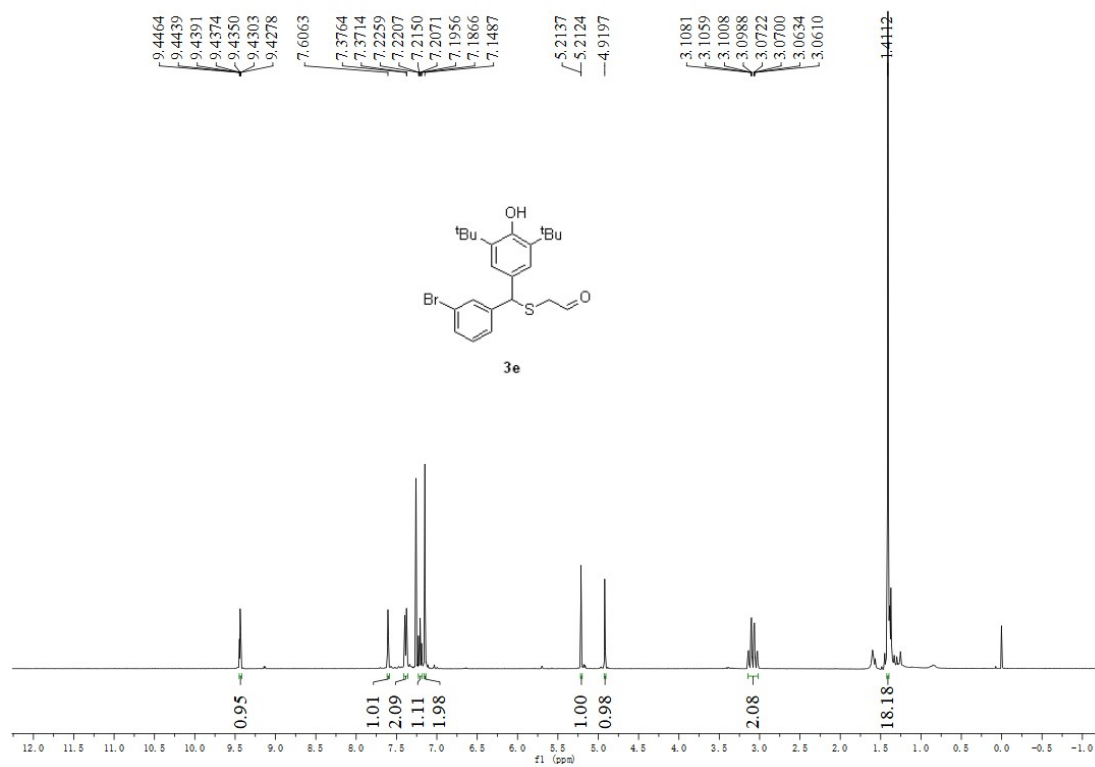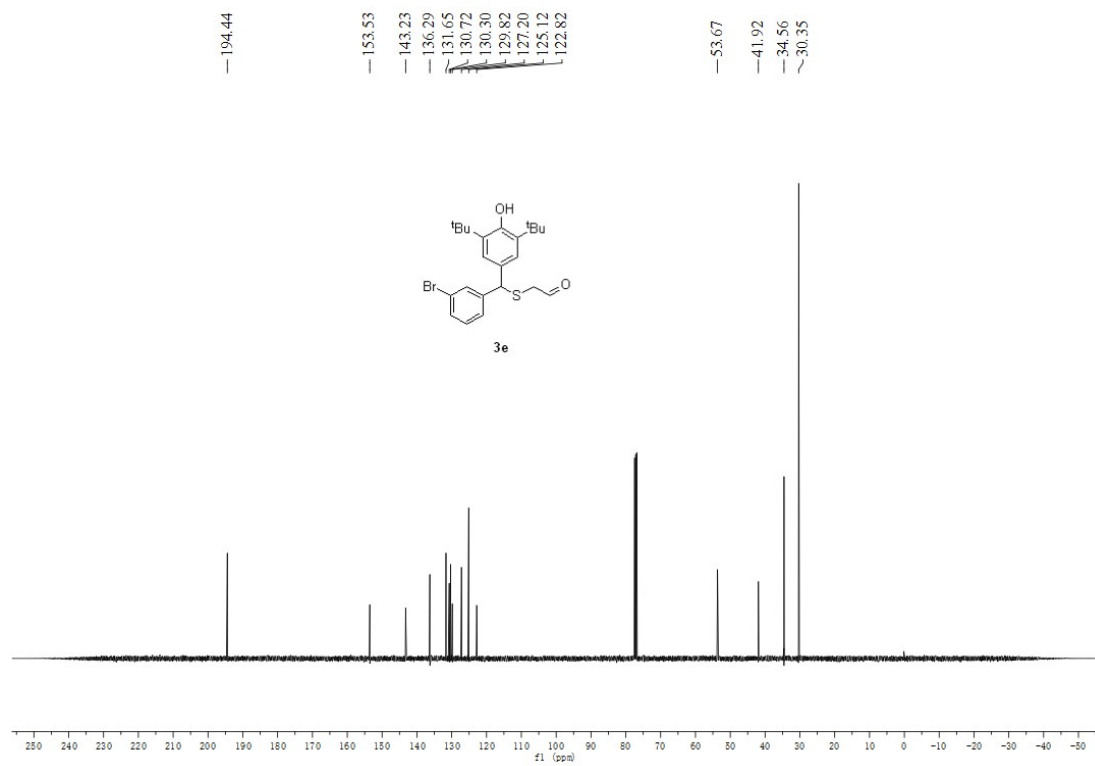

$^1\text{H}$  and  $^{13}\text{C}$  NMR spectra of compound **3f**

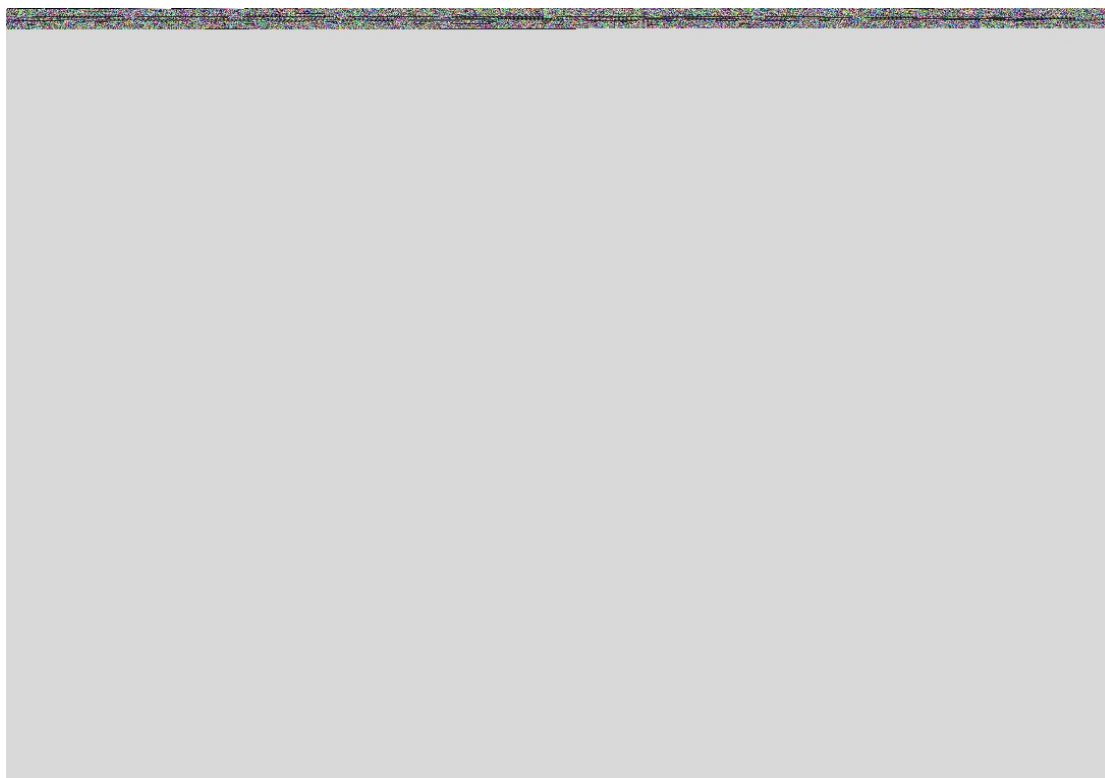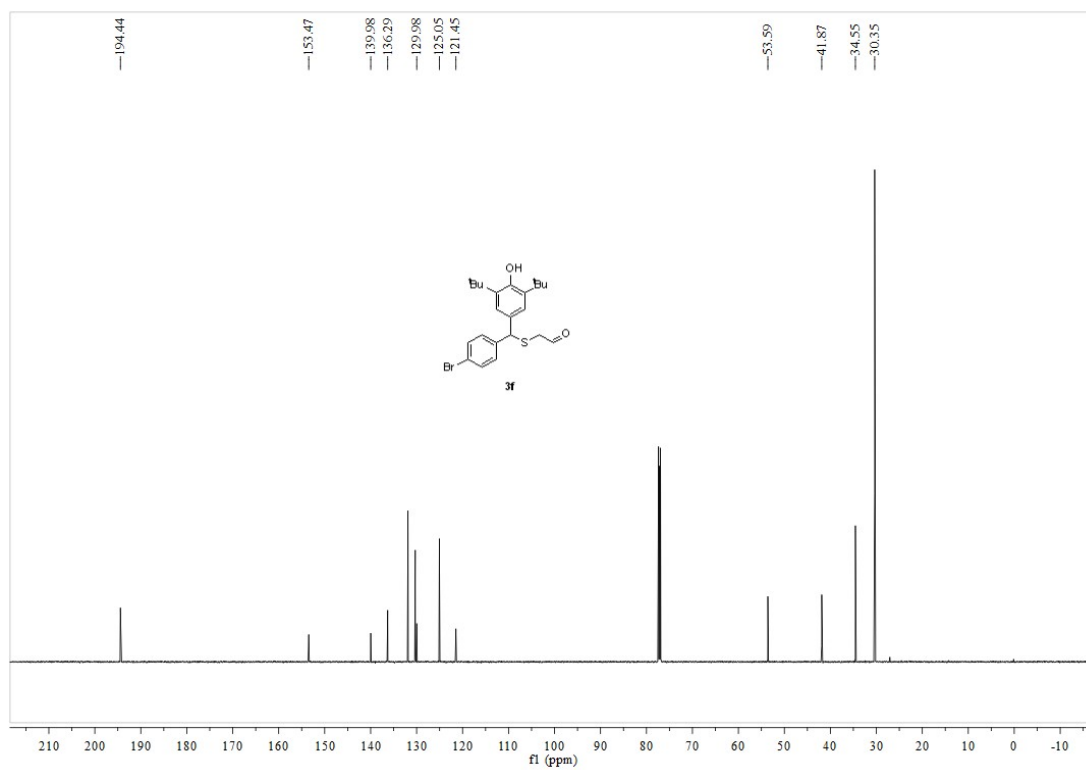

$^1\text{H}$  and  $^{13}\text{C}$  NMR spectra of compound **3g**

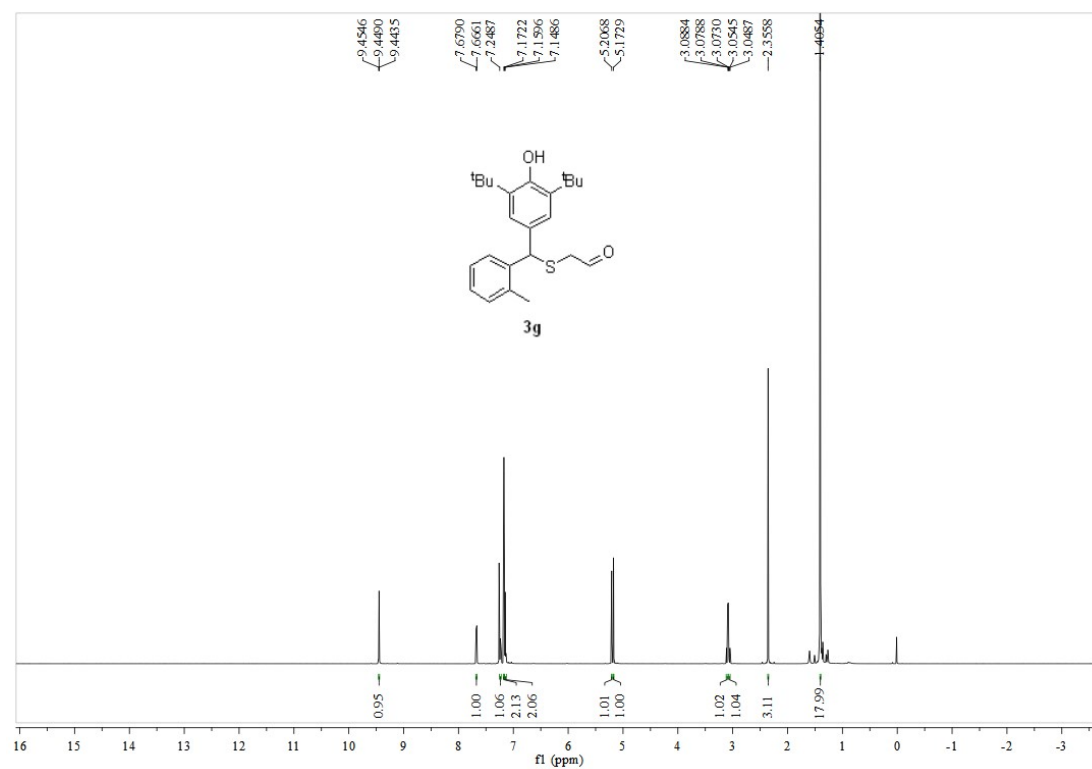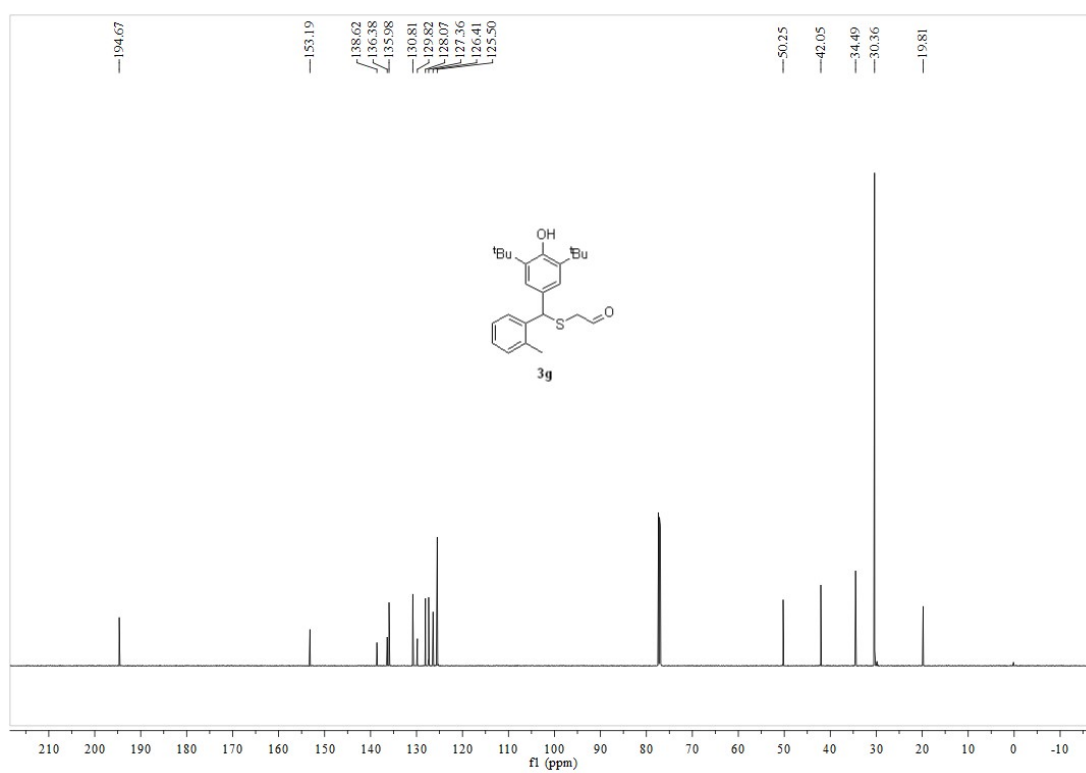

$^1\text{H}$  and  $^{13}\text{C}$  NMR spectra of compound **3h**

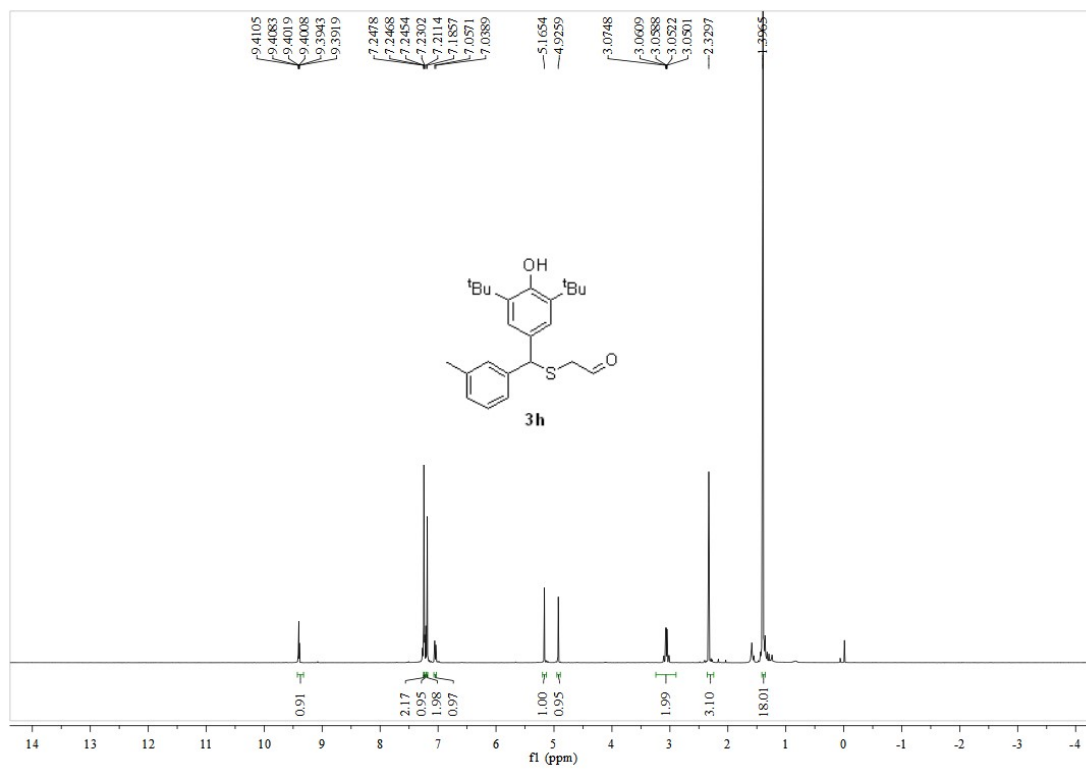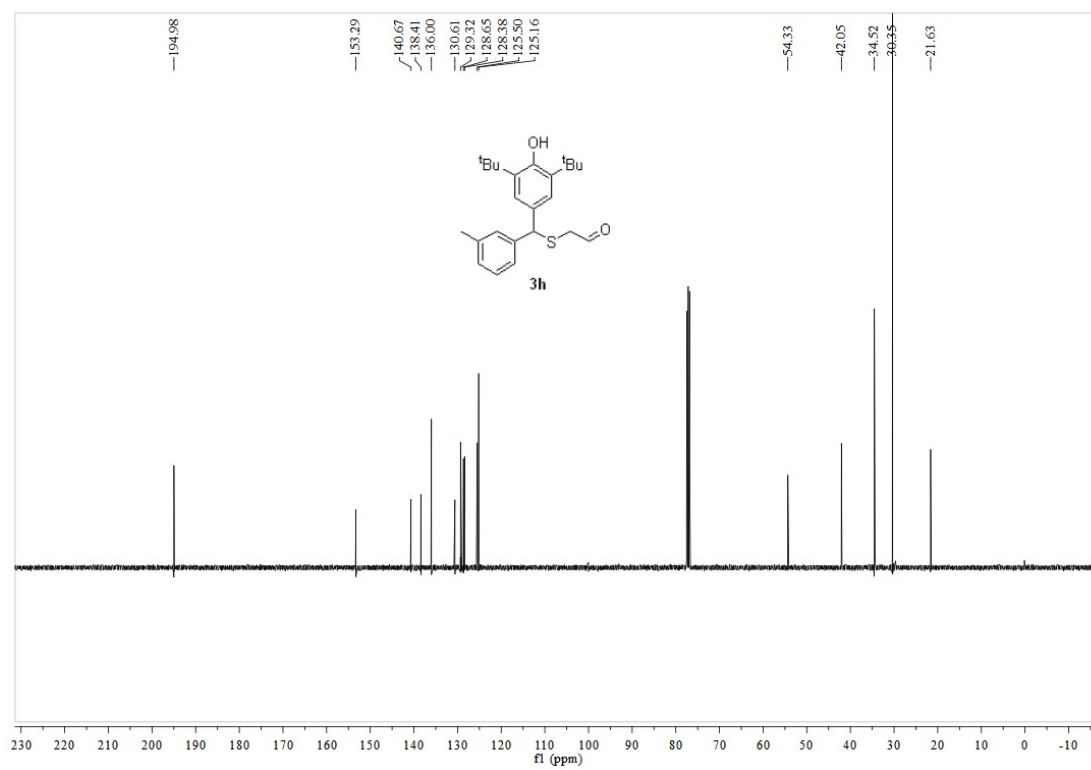

$^1\text{H}$  and  $^{13}\text{C}$  NMR spectra of compound **3i**

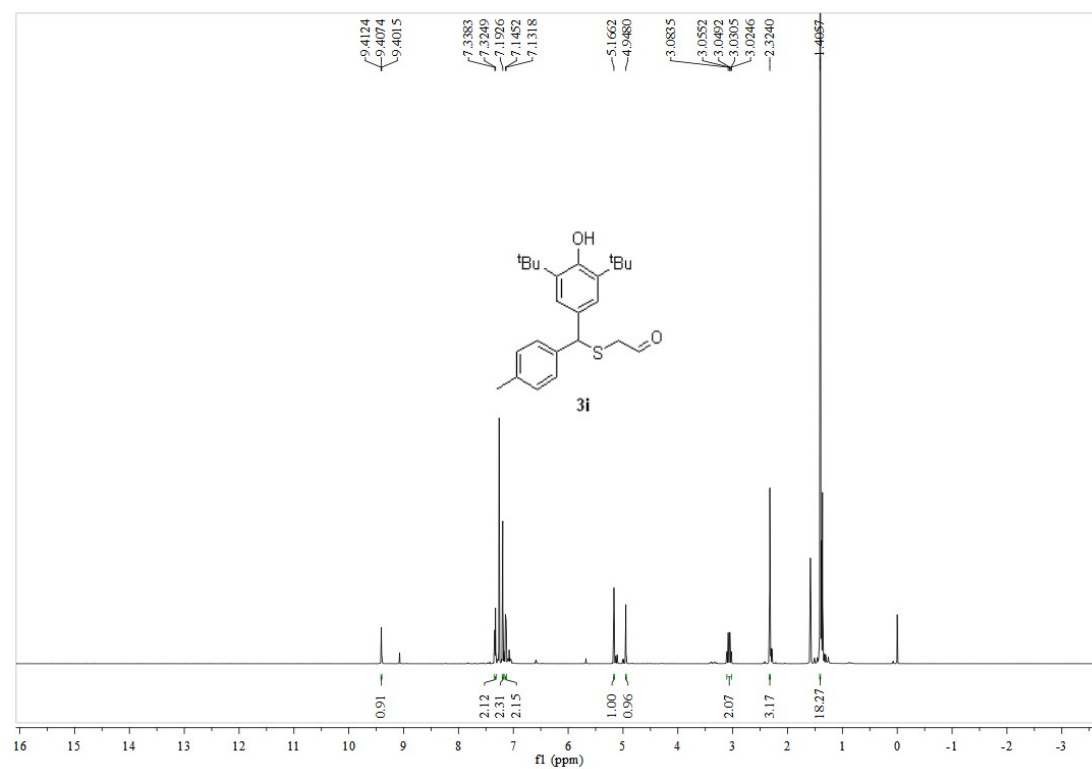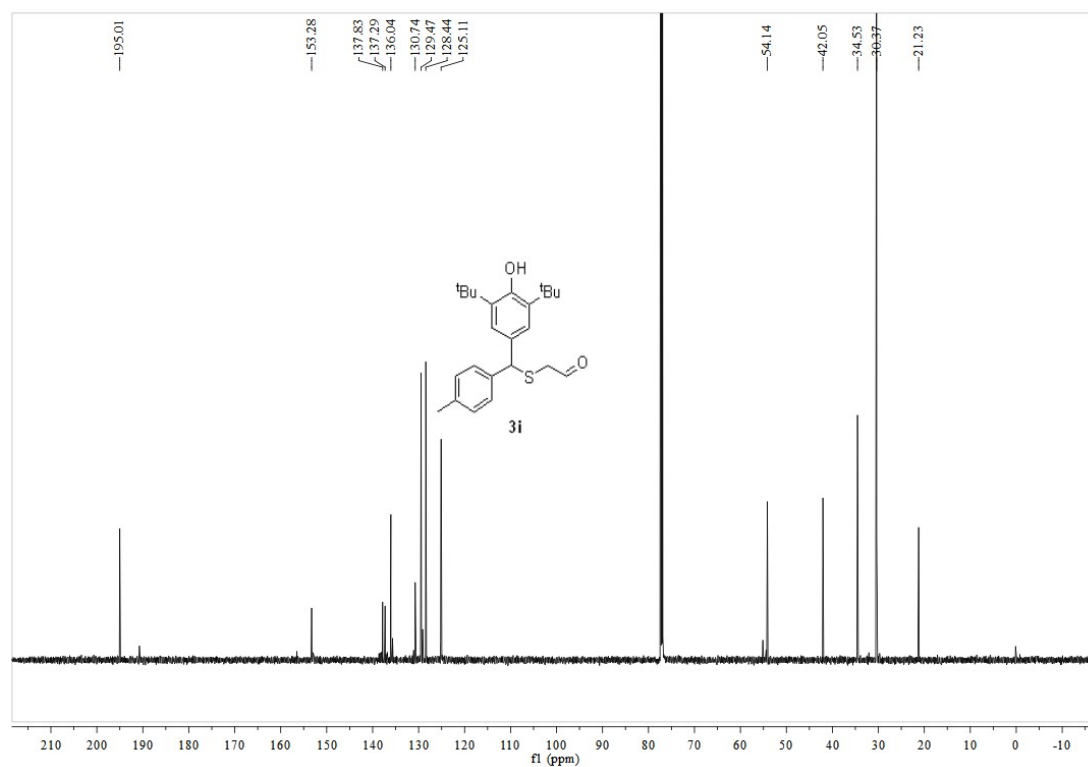

# $^1\text{H}$ and $^{13}\text{C}$ NMR spectra of compound **3j**

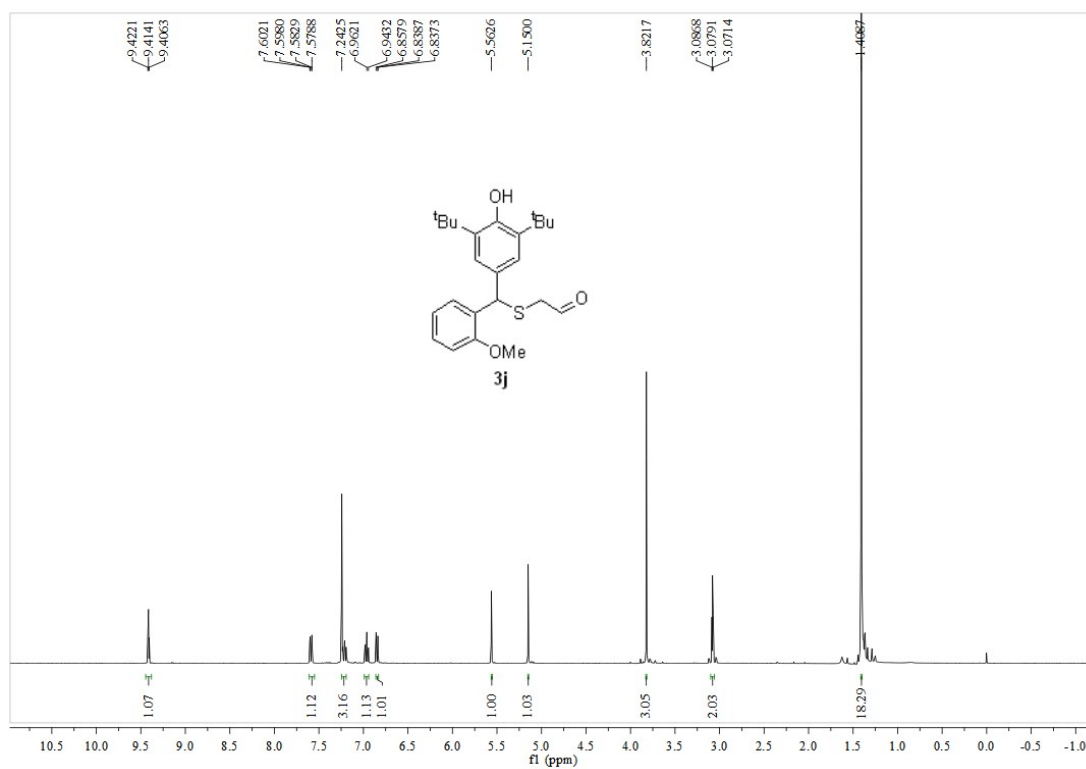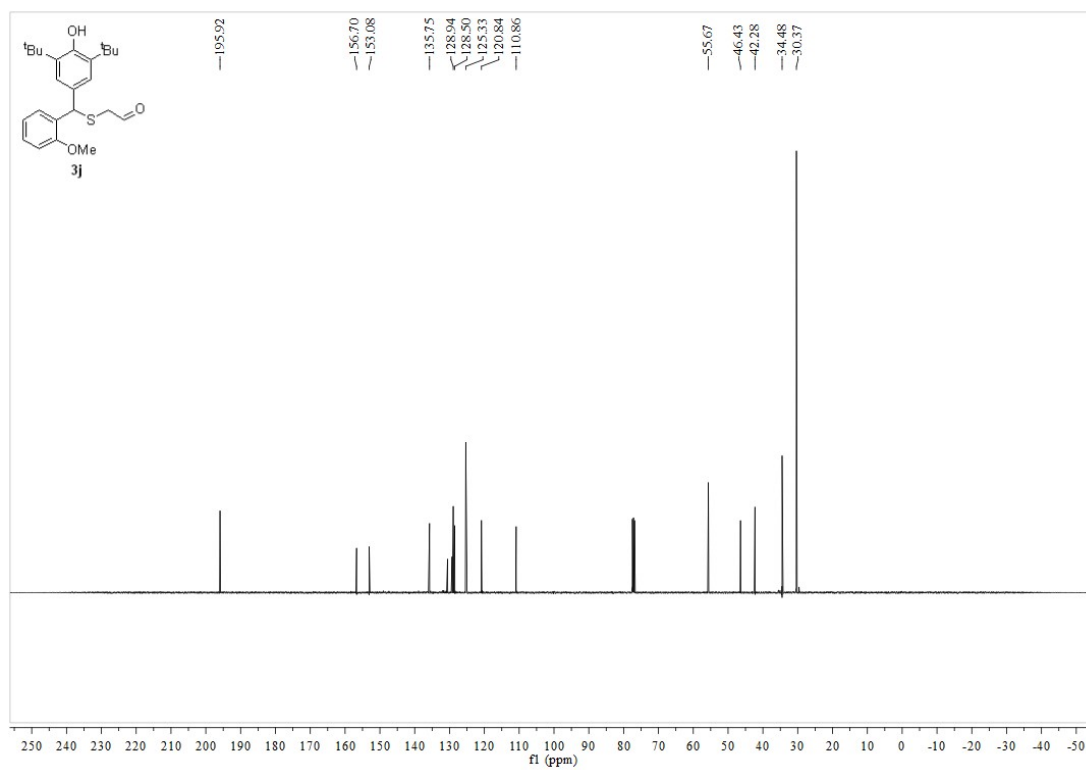

$^1\text{H}$  and  $^{13}\text{C}$  NMR spectra of compound **3k**

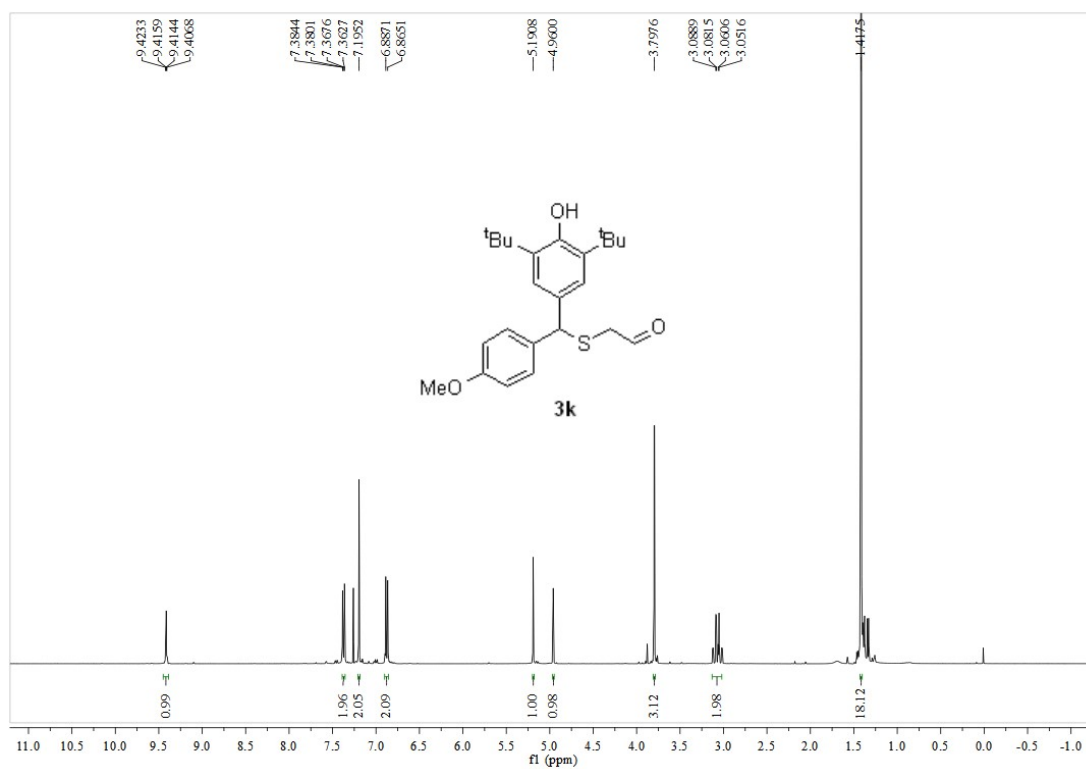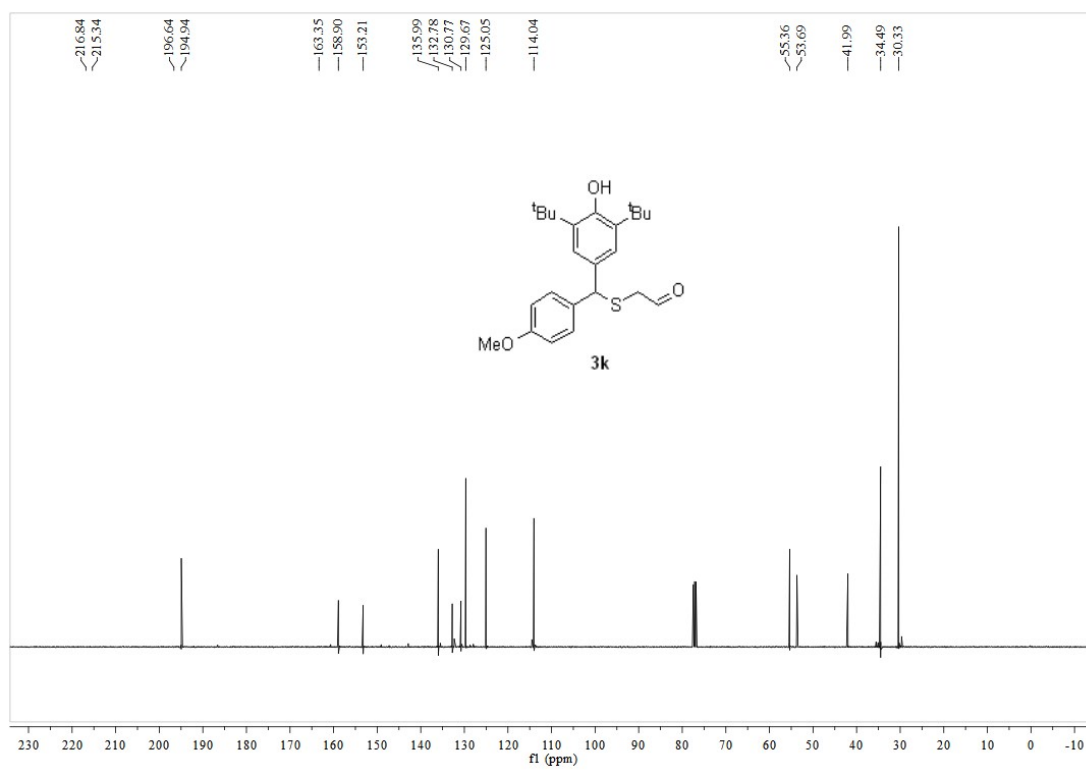

# $^1\text{H}$ and $^{13}\text{C}$ NMR spectra of compound **31**

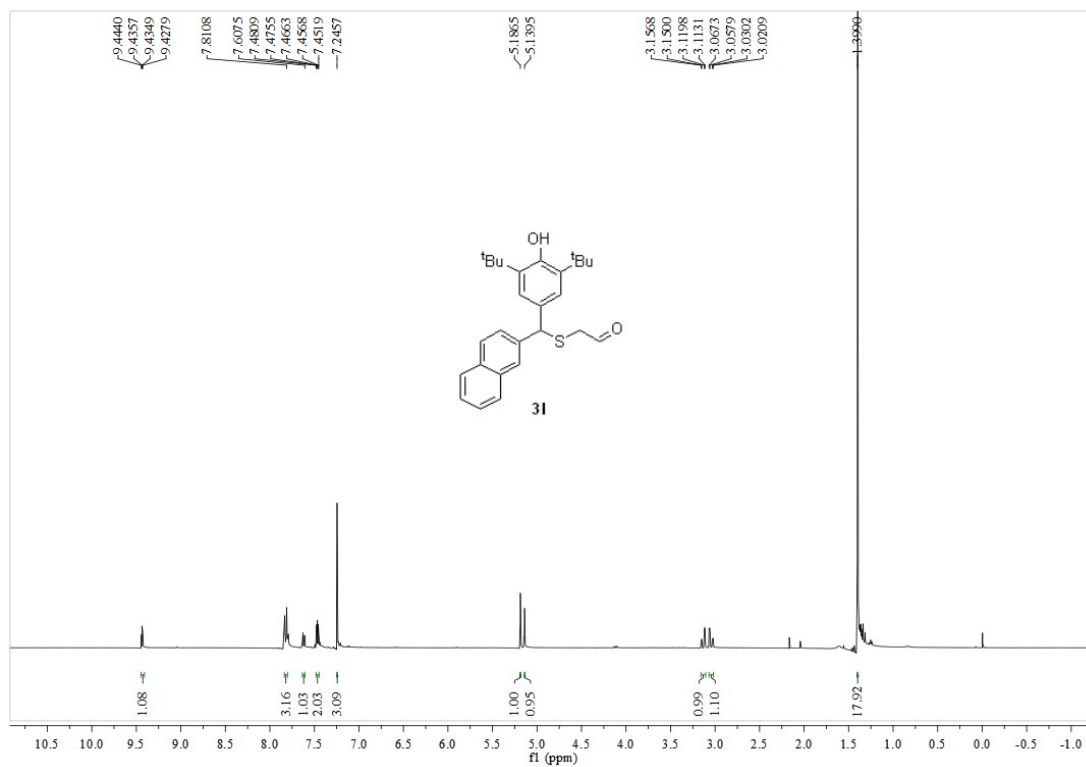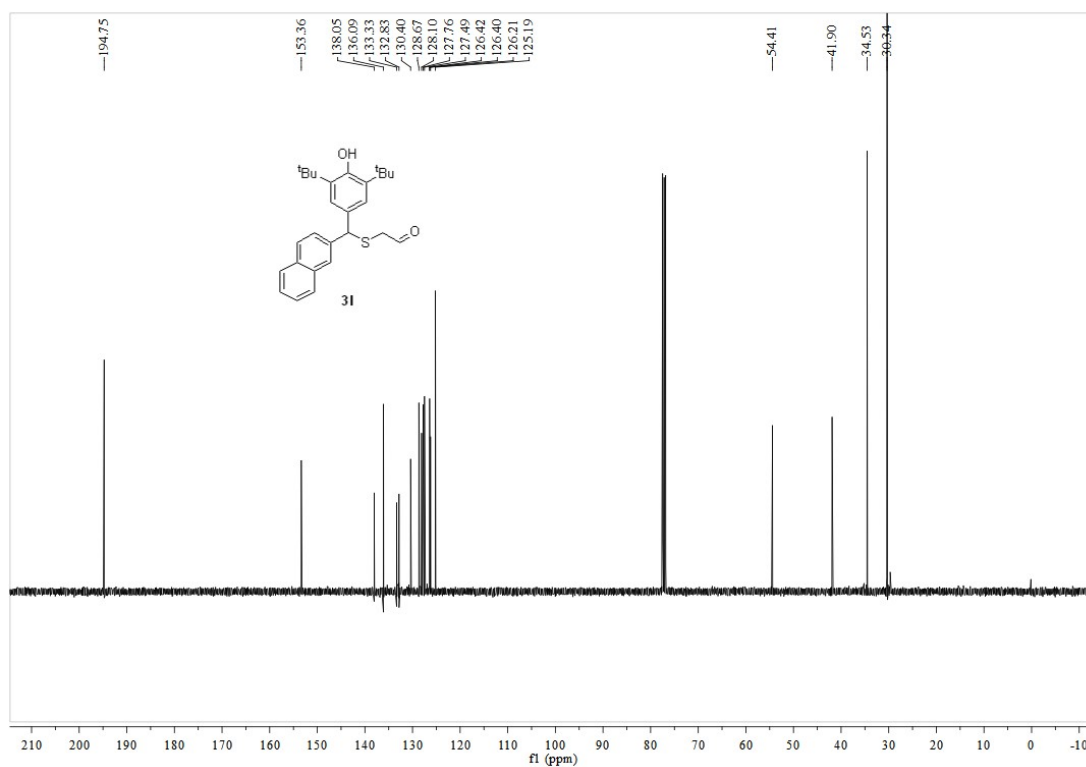



$^1\text{H}$  and  $^{13}\text{C}$  NMR spectra of compound **3m**

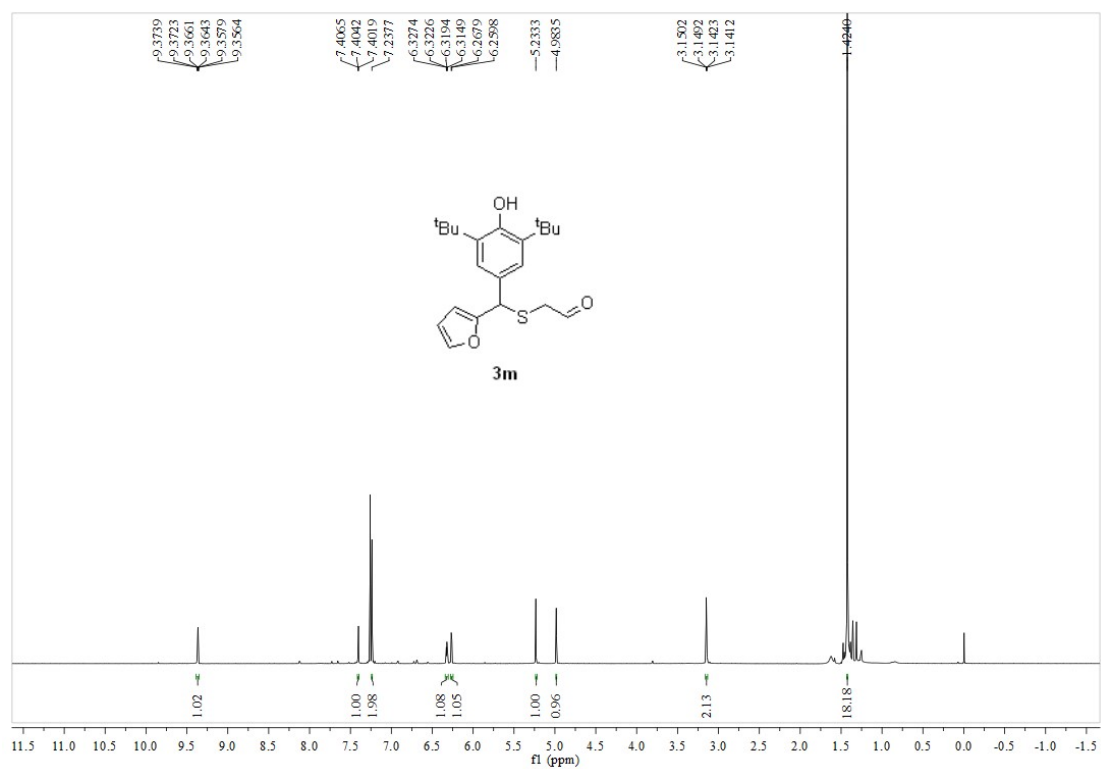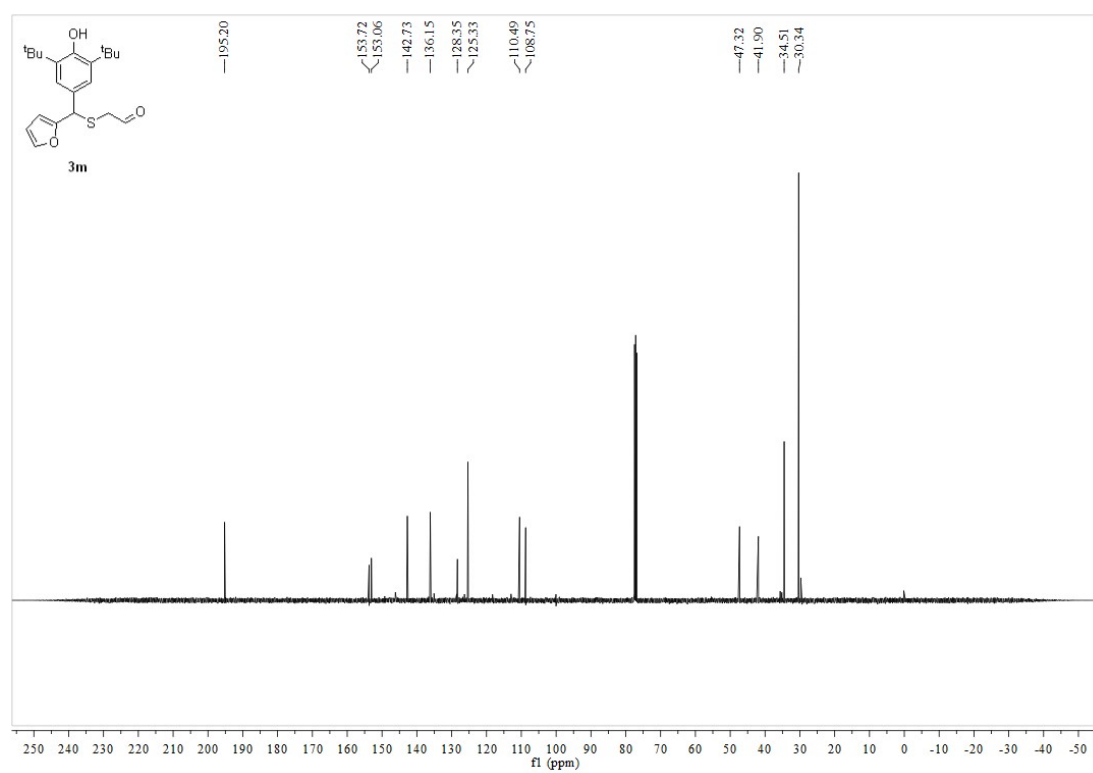

$^1\text{H}$  and  $^{13}\text{C}$  NMR spectra of compound **3n**

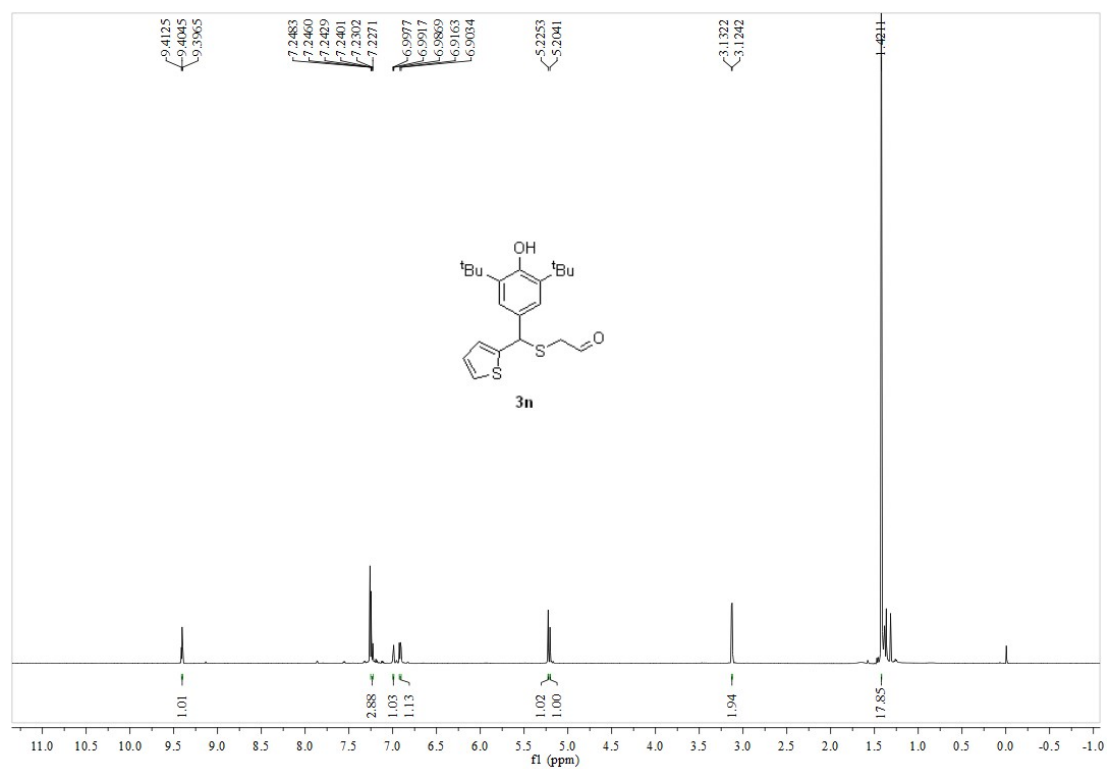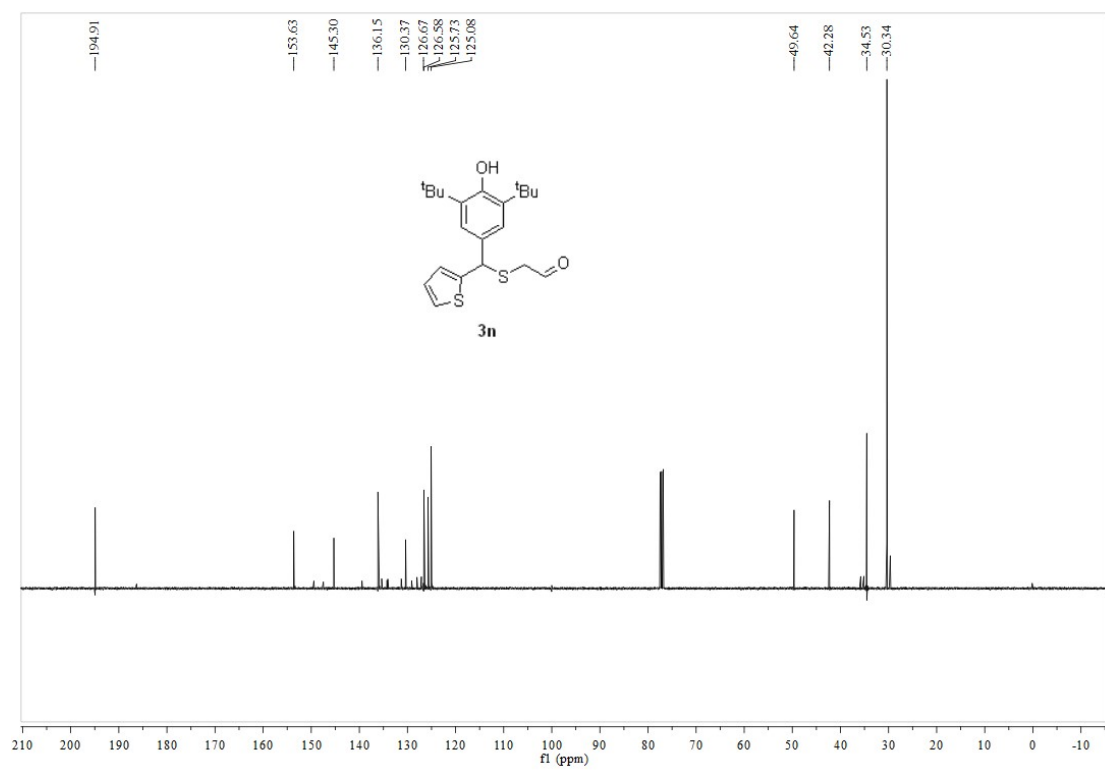

$^1\text{H}$  and  $^{13}\text{C}$  NMR spectra of compound **3o**

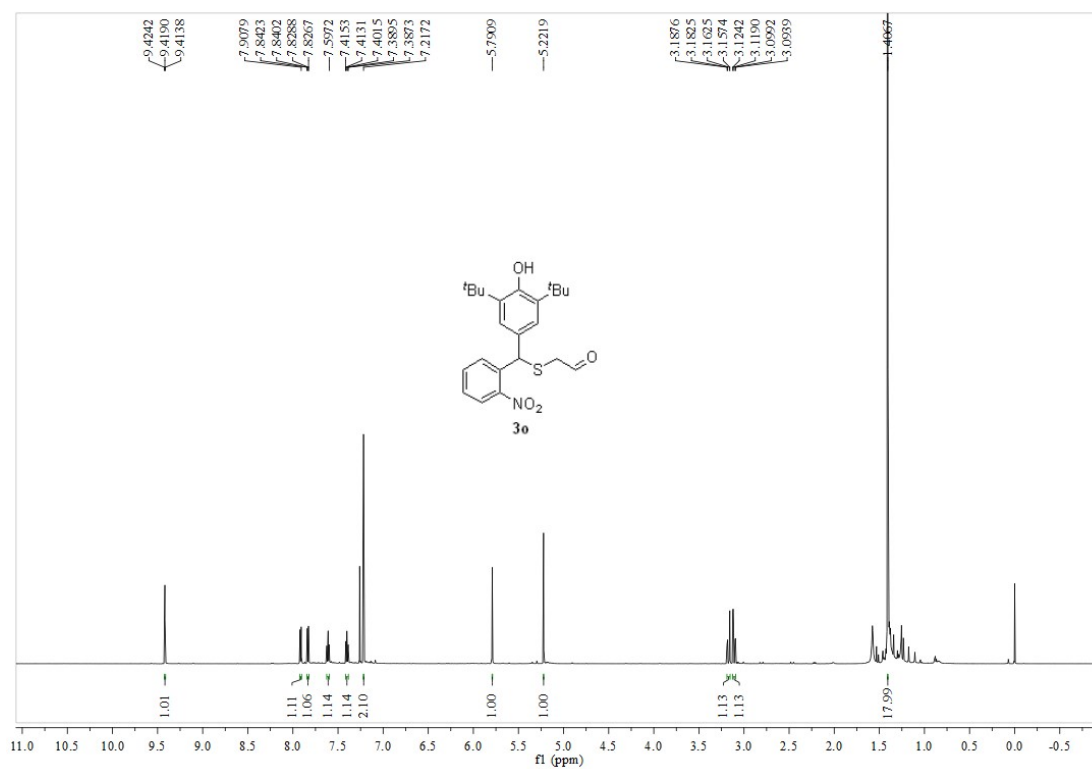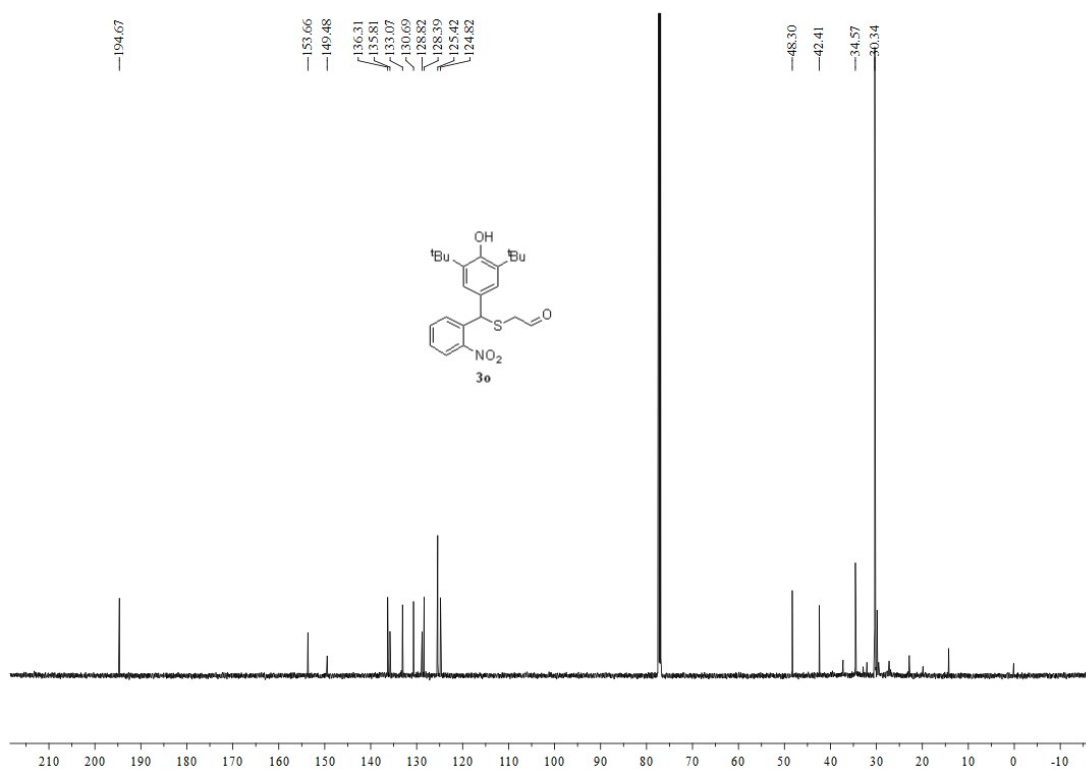

$^1\text{H}$  and  $^{13}\text{C}$  NMR spectra of compound **3p**

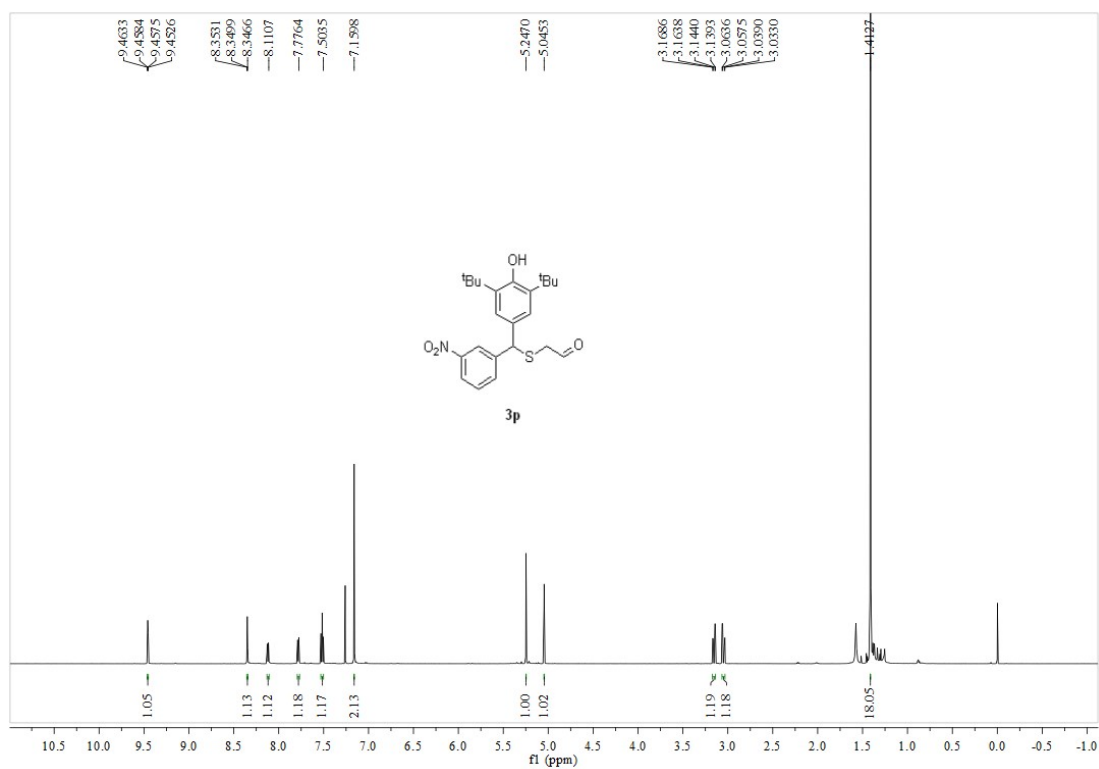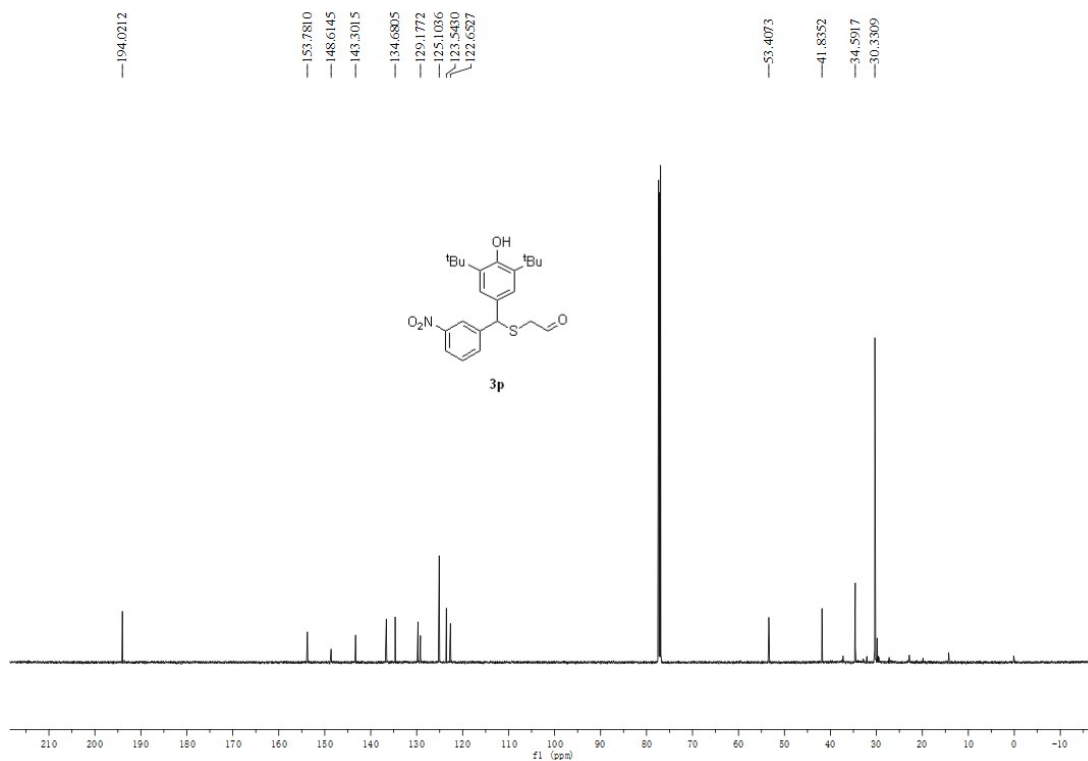

$^1\text{H}$  and  $^{13}\text{C}$  NMR spectra of compound **3q**

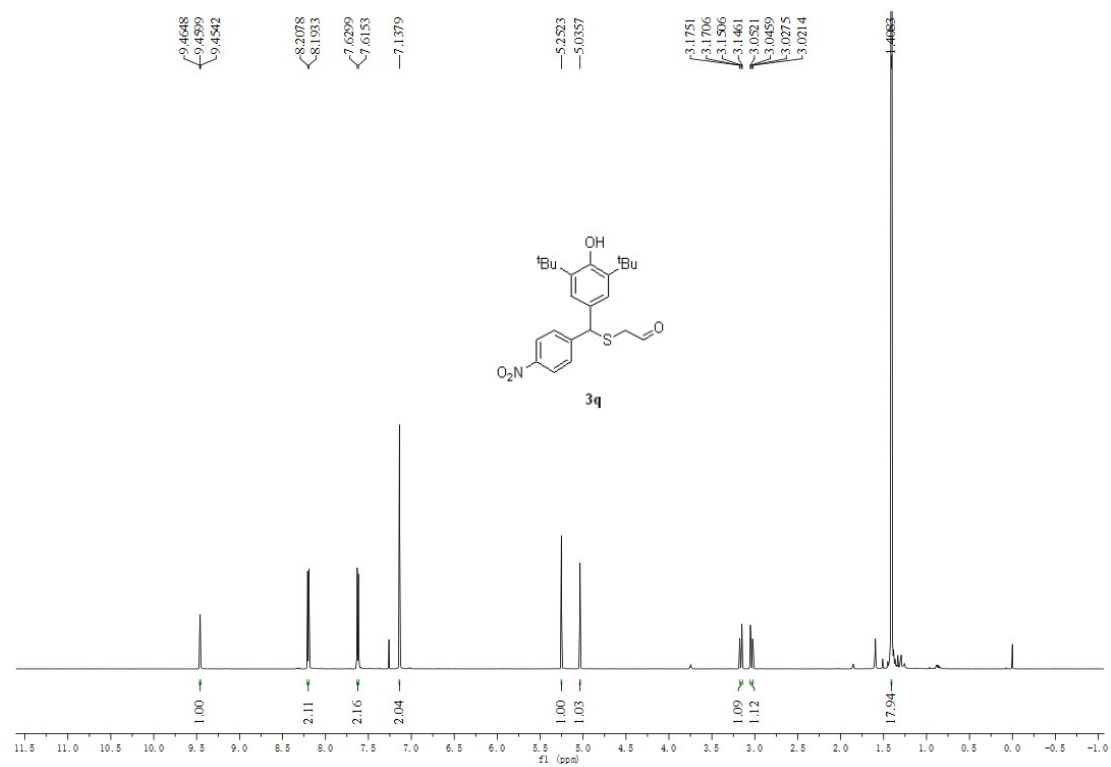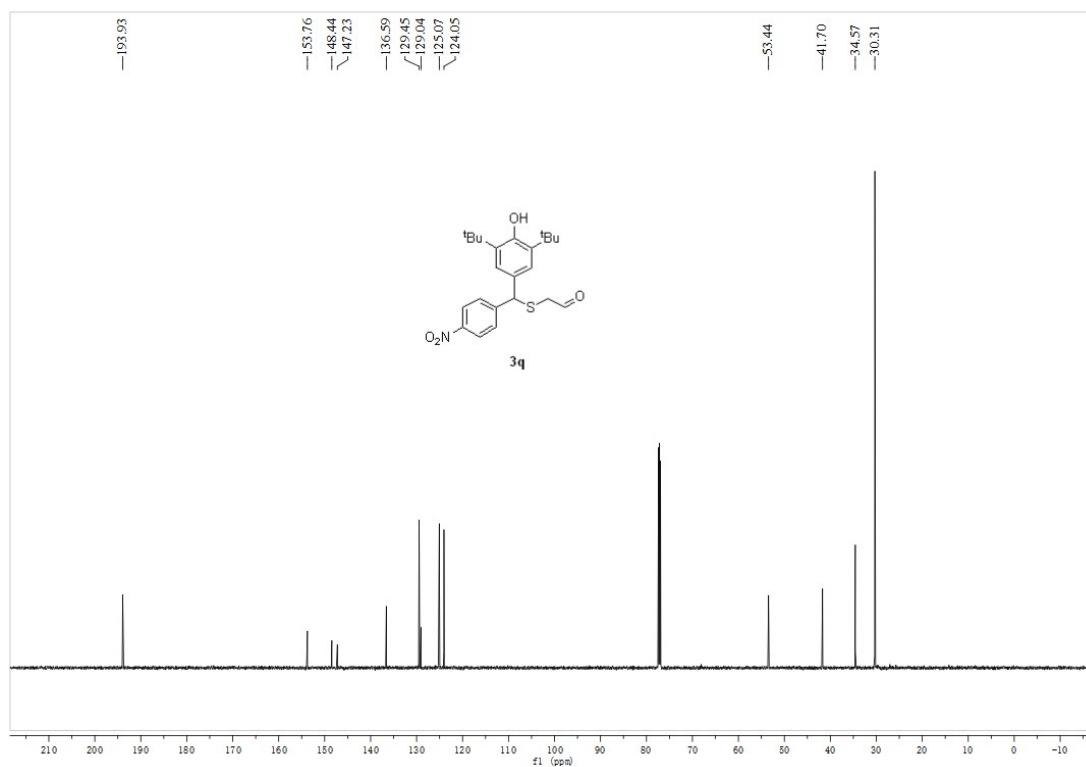

# $^1\text{H}$ and $^{13}\text{C}$ NMR spectra of compound **3r**

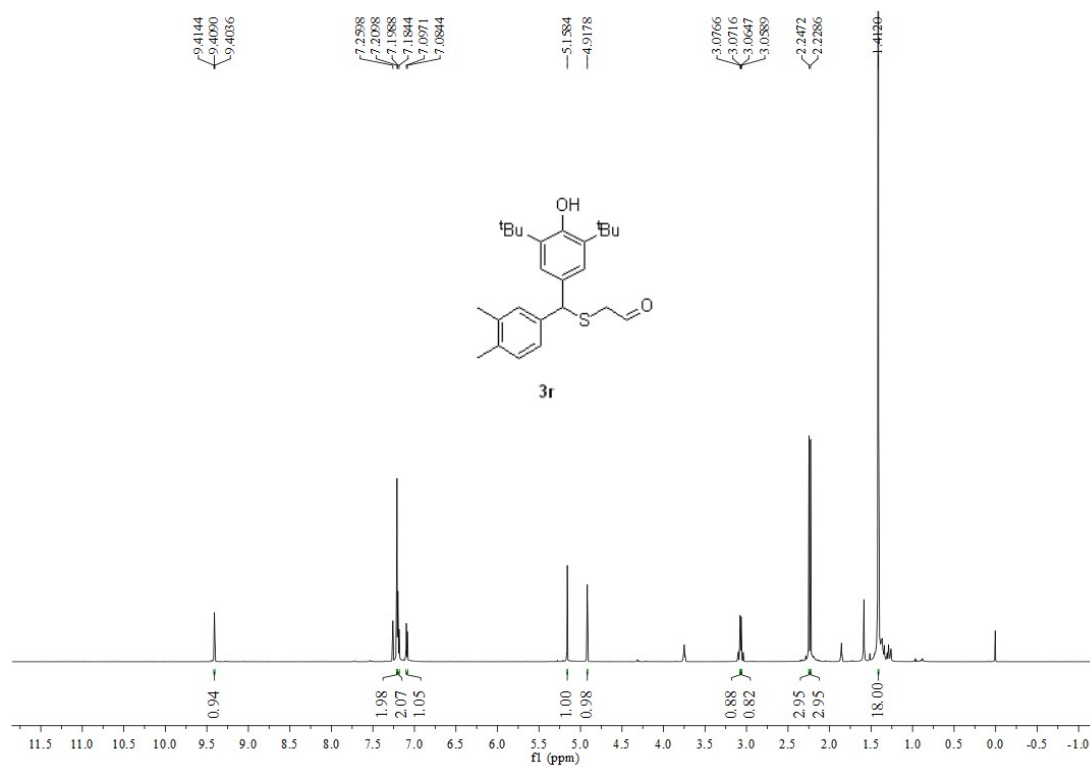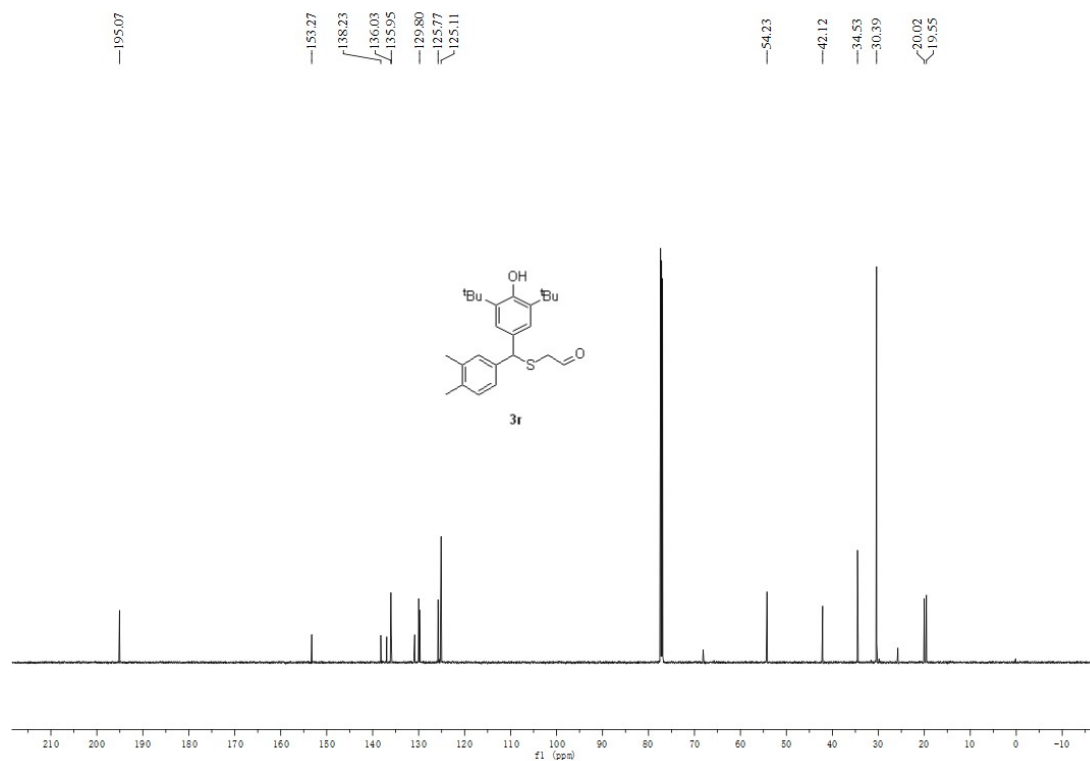

$^1\text{H}$  and  $^{13}\text{C}$  NMR spectra of compound **3s**

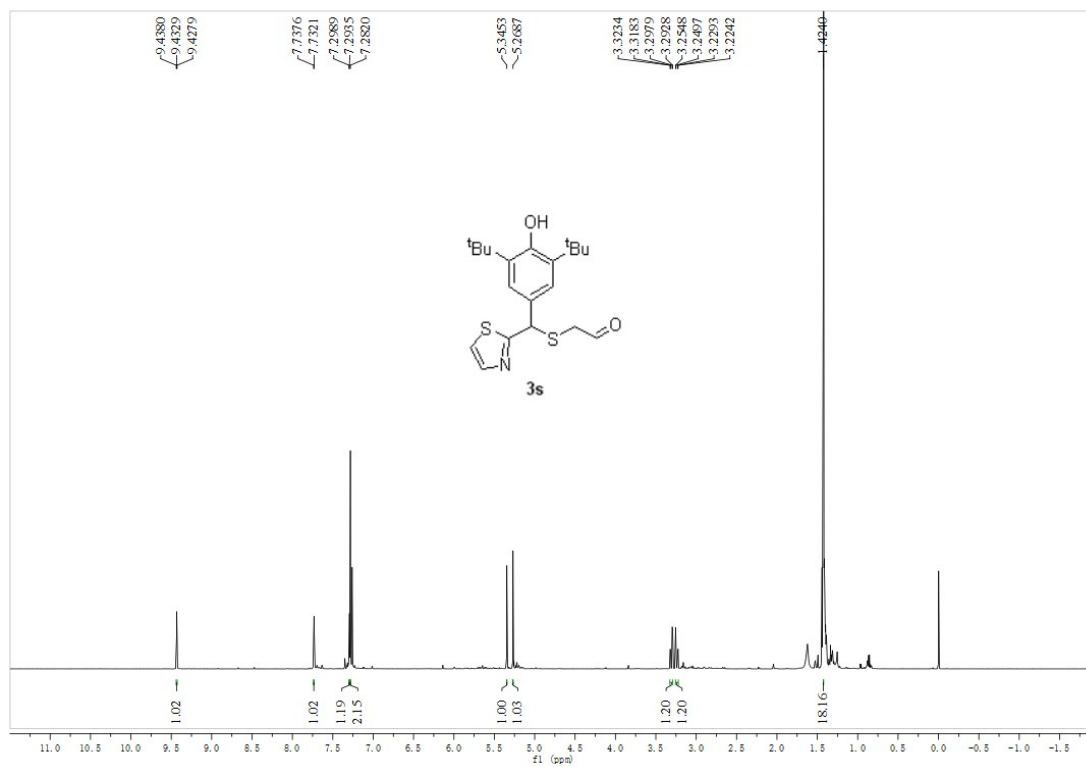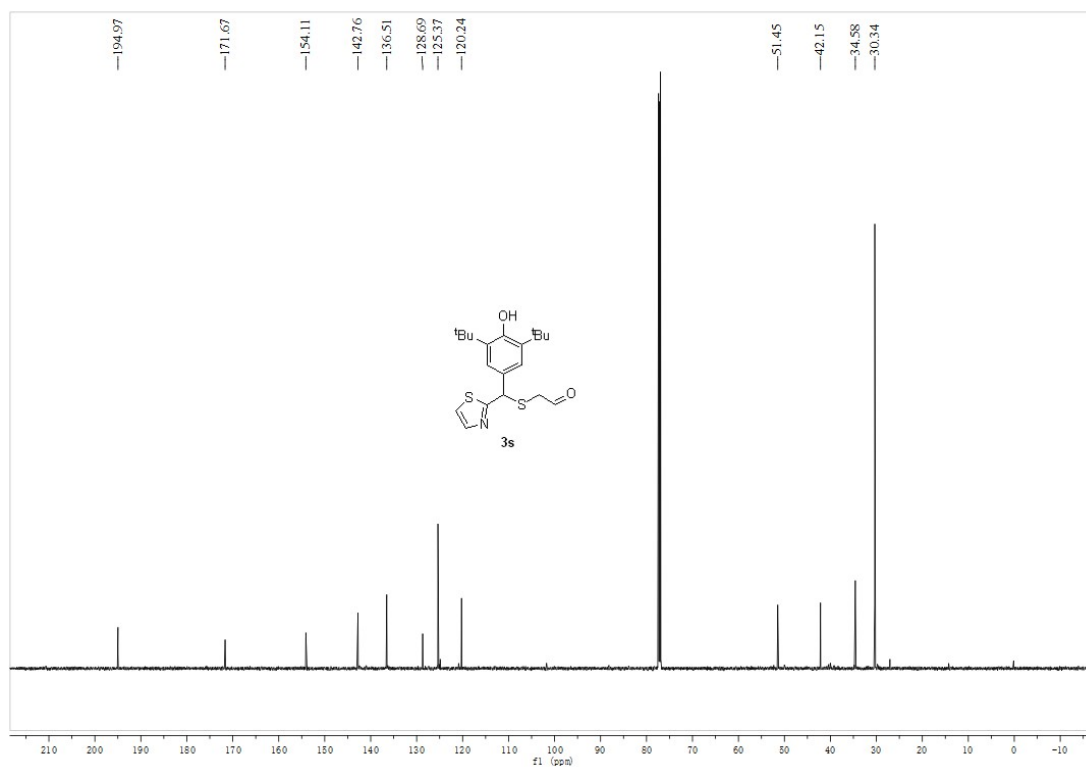

$^1\text{H}$  and  $^{13}\text{C}$  NMR spectra of compound **3t**

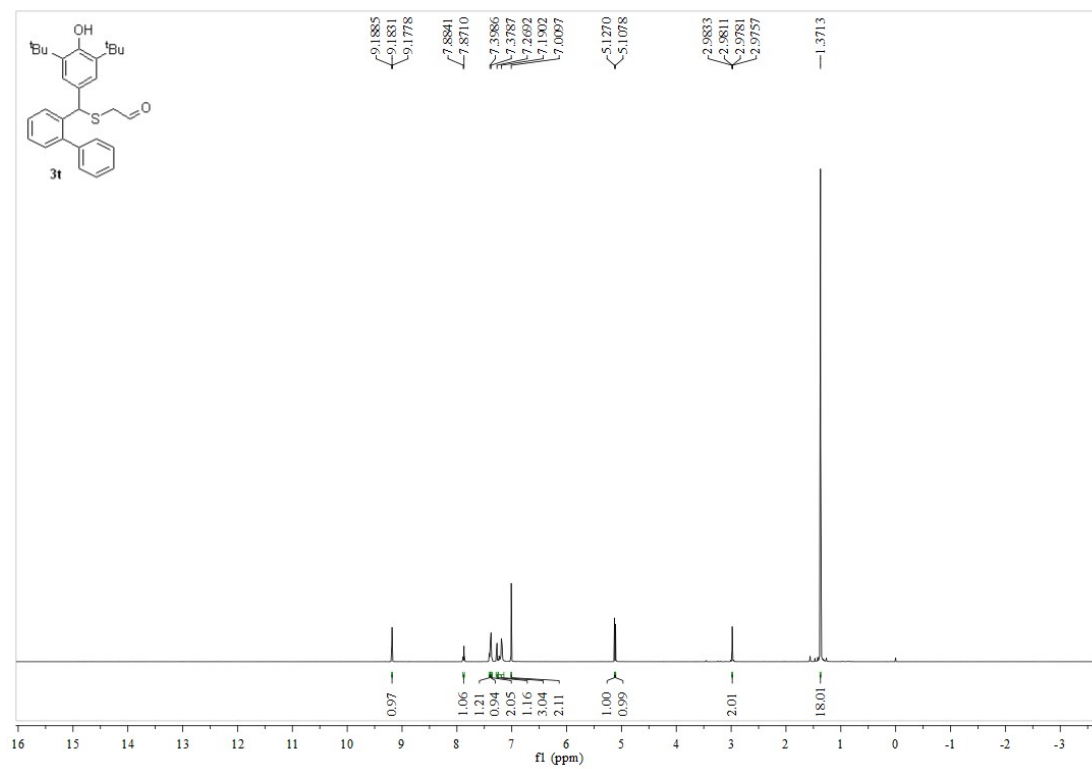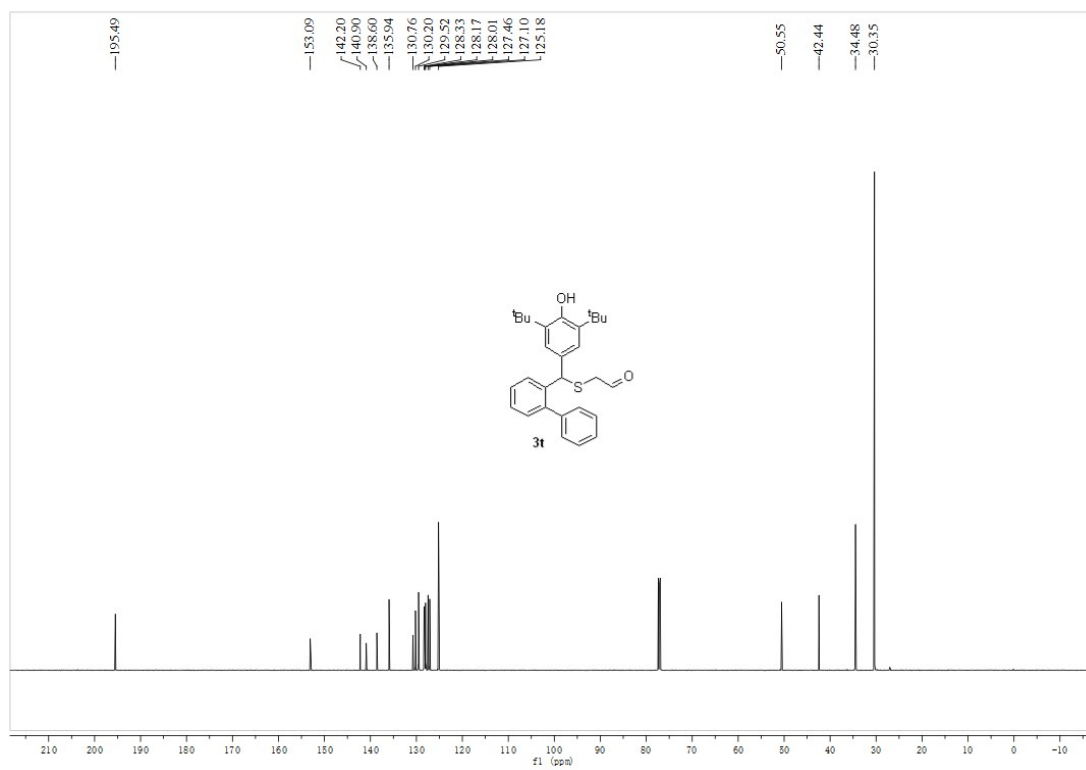



# $^1\text{H}$ and $^{13}\text{C}$ NMR spectra of compound **5a**

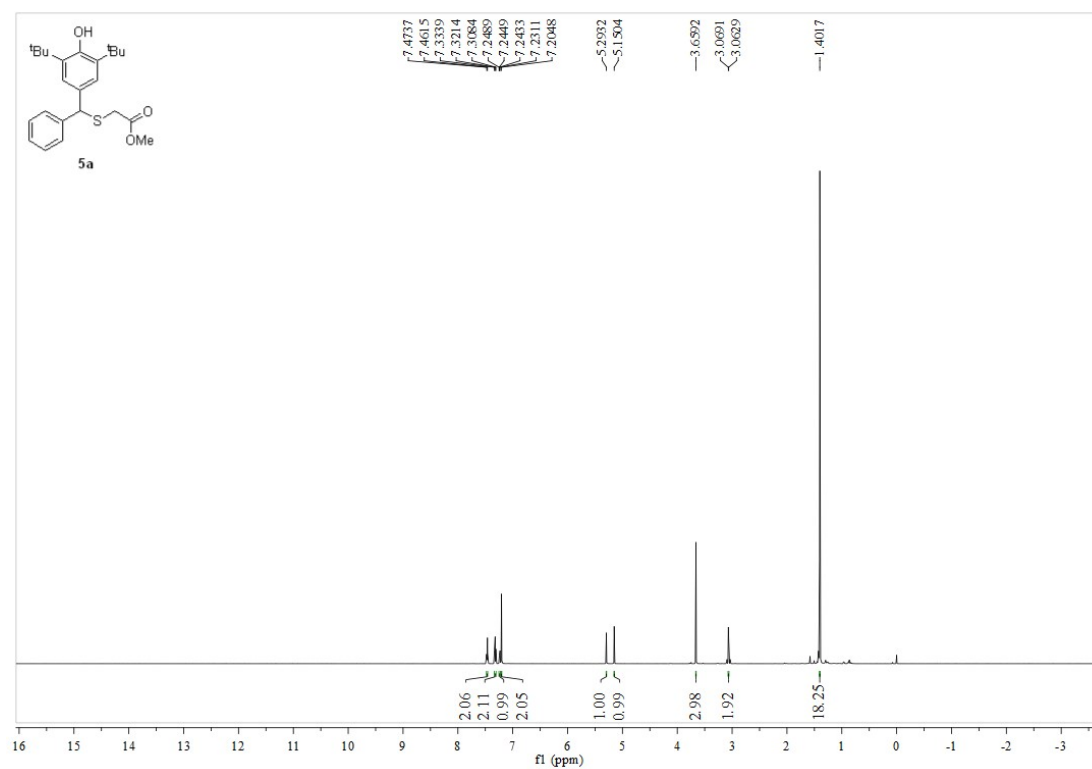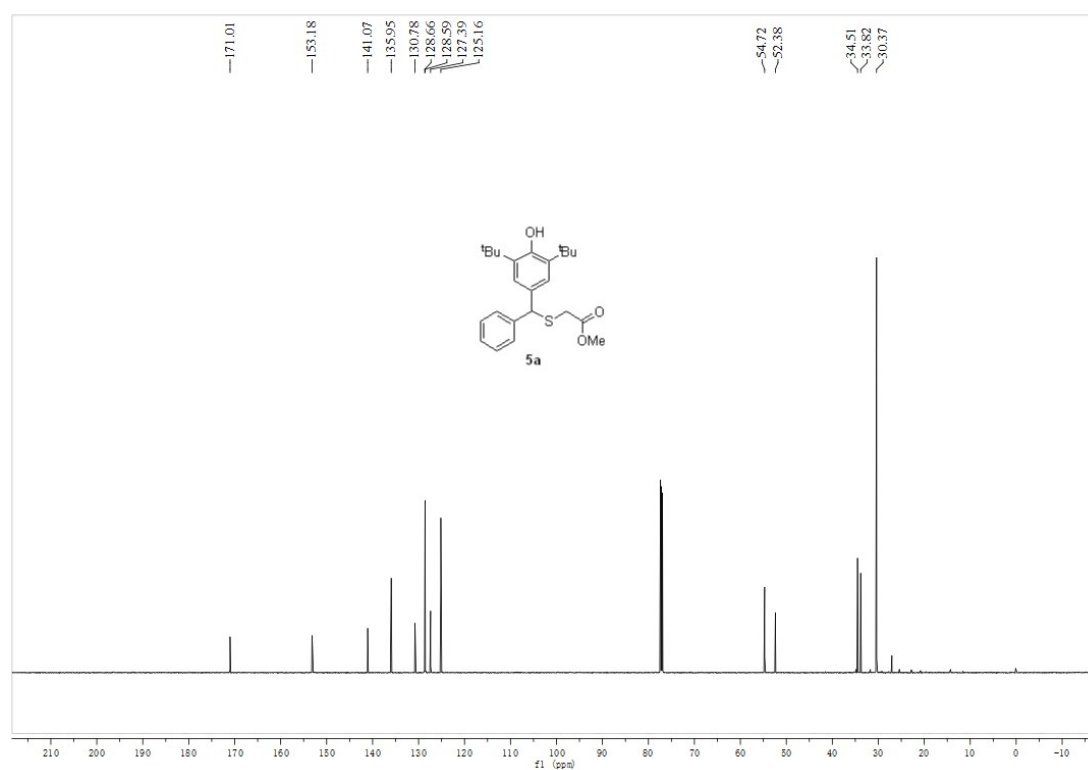

# $^1\text{H}$ and $^{13}\text{C}$ NMR spectra of compound 6

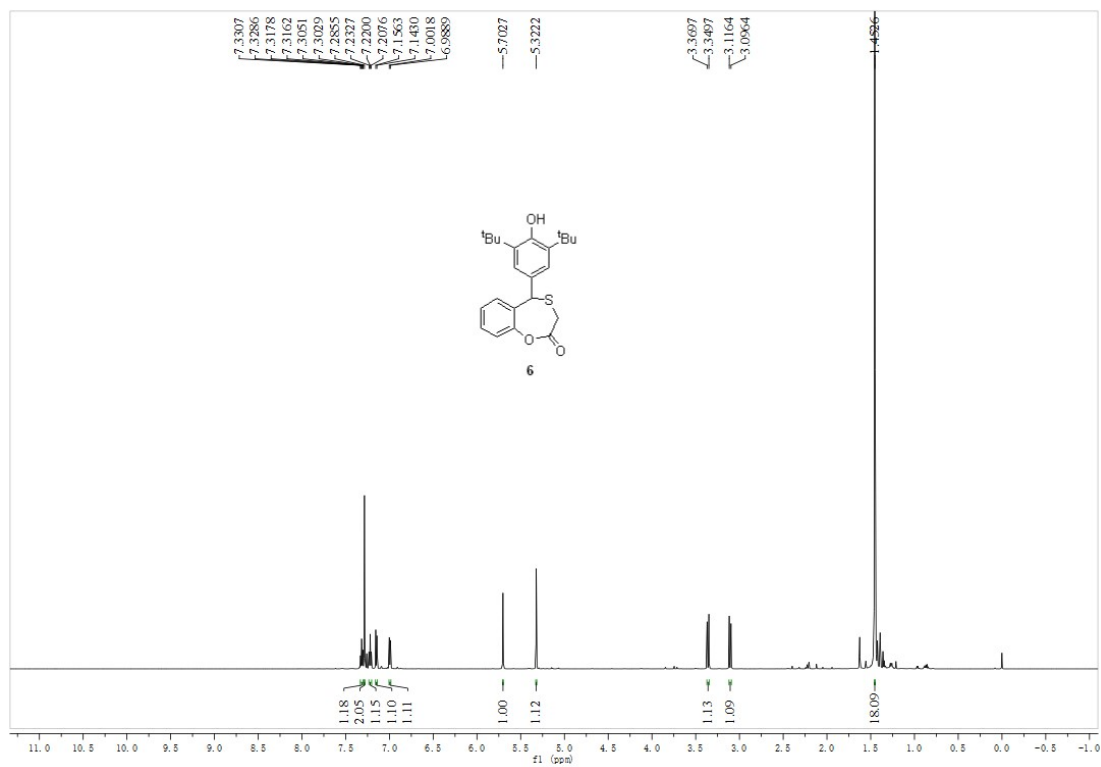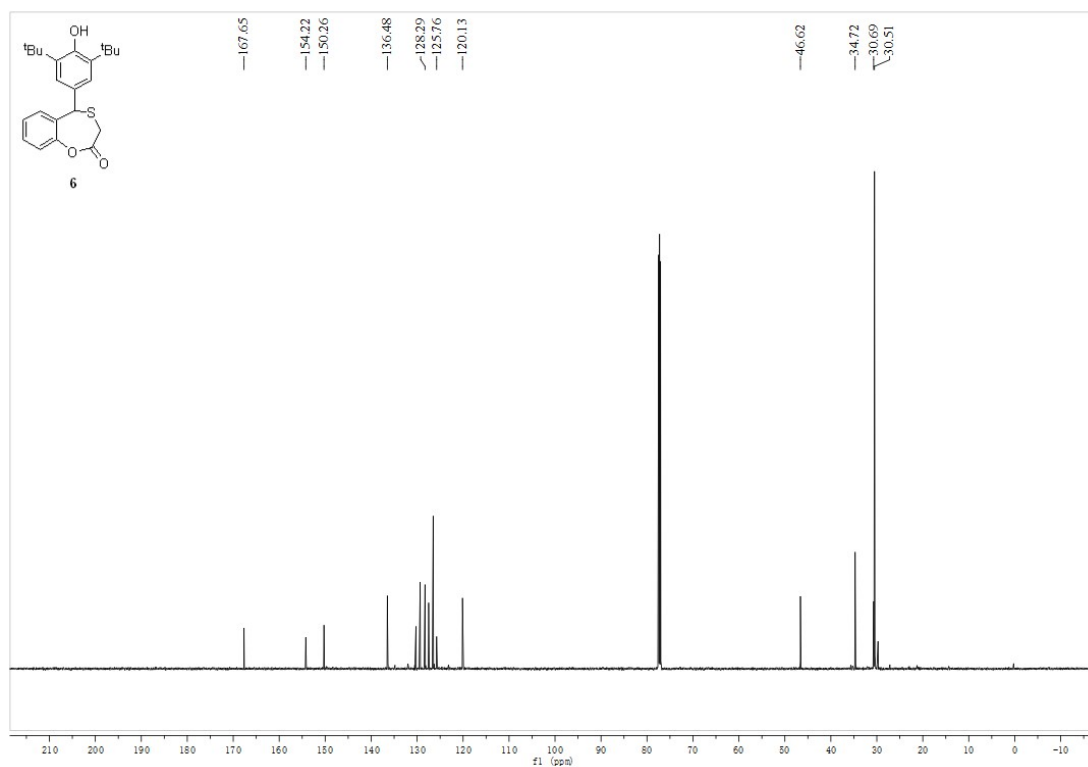

$^1\text{H}$  and  $^{13}\text{C}$  NMR spectra of compound **8a**

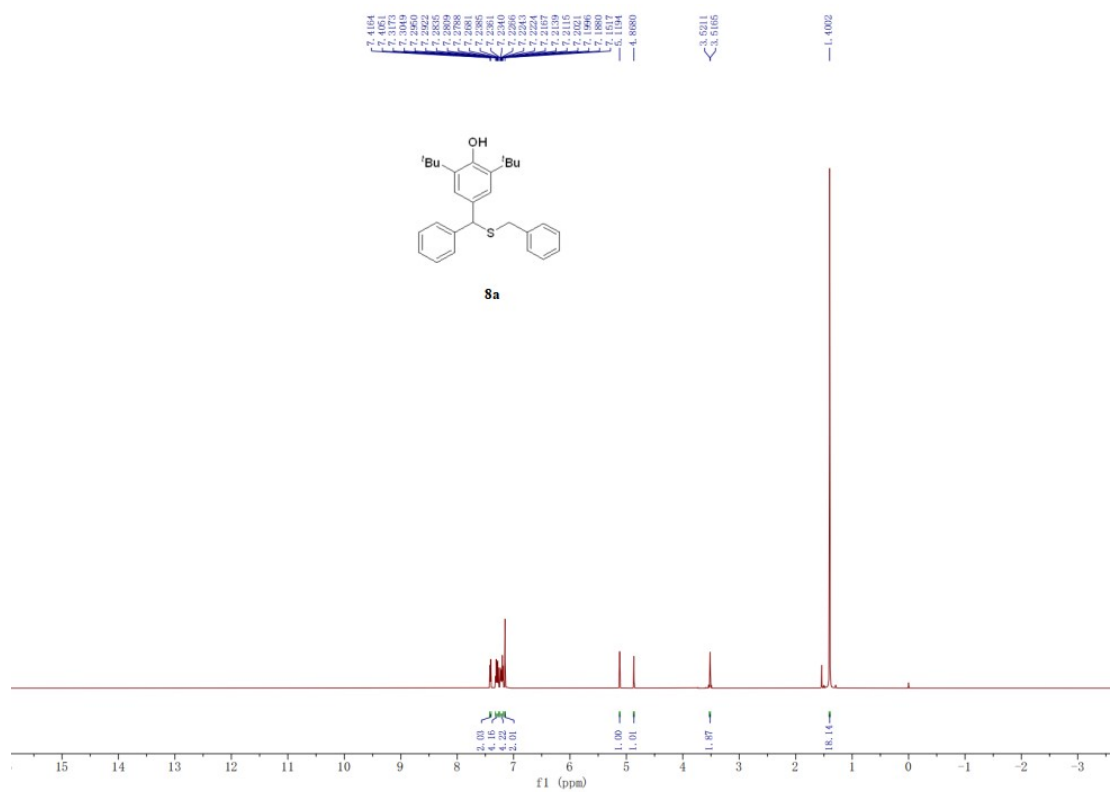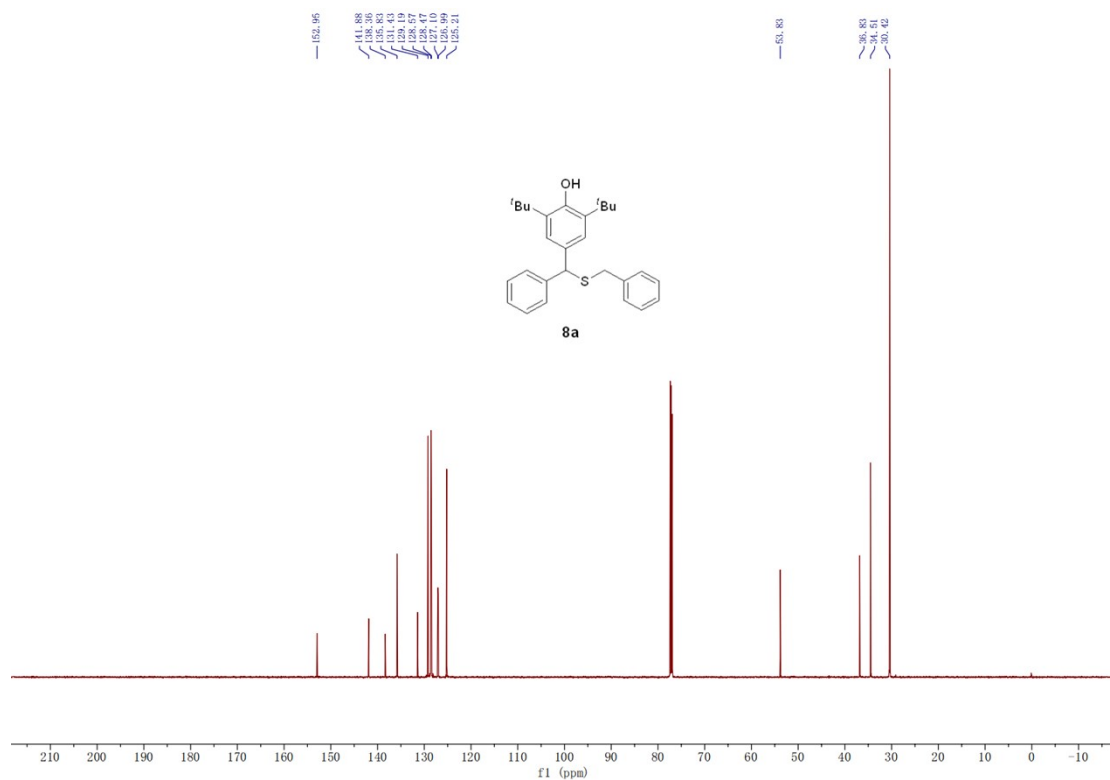

# $^1\text{H}$ and $^{13}\text{C}$ NMR spectra of compound **8b**

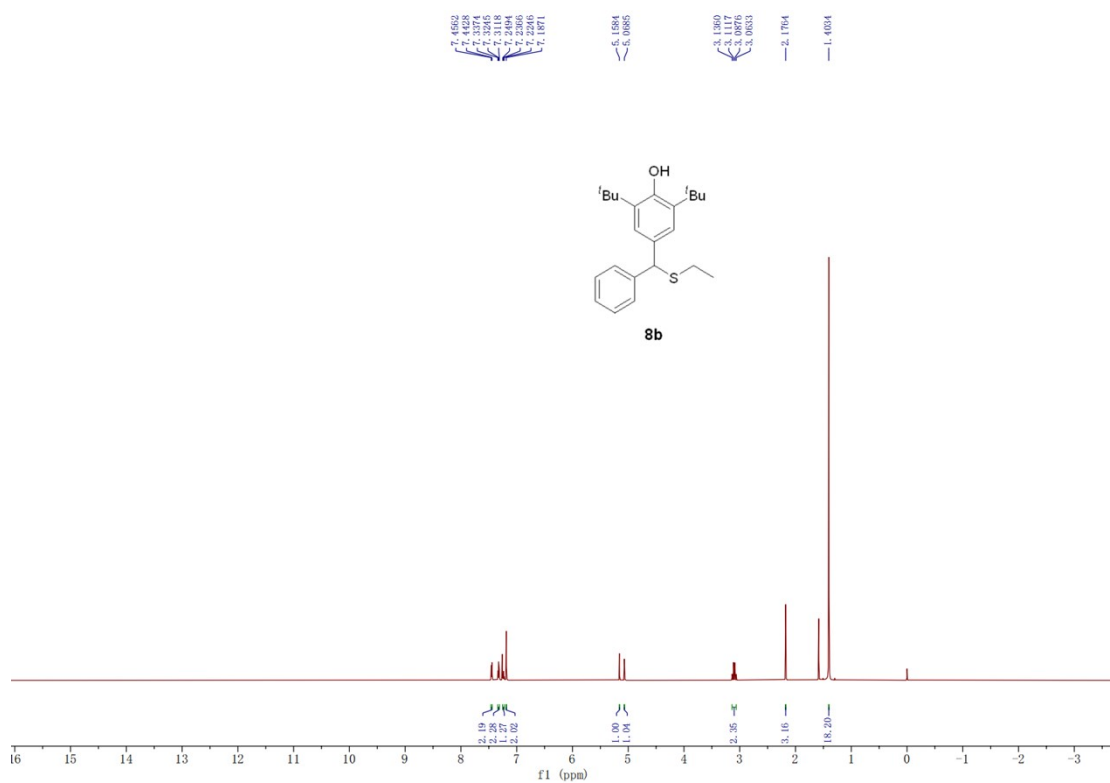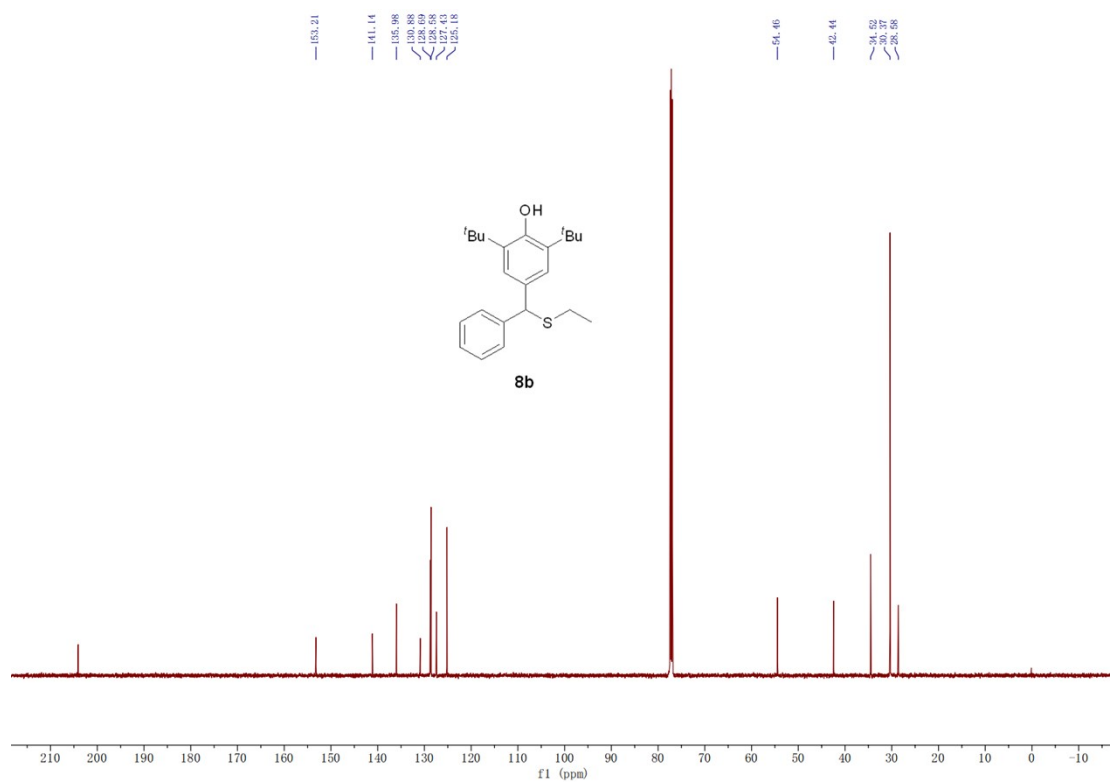

Supplement: d3ra01815f1.pdf [file d3ra01815f1.pdf]
